# Supplementary material for: The temporal effect of platelet-rich plasma on pain and physical function in the treatment of knee osteoarthritis: systematic review and meta-analysis of randomized controlled trials
Source: PubMed Central journal article supplement (PMC5260061; doi:10.1186/s13018-017-0521-3), 2017-01-23
Supplement: 13018_2017_521_MOESM4_ESM.pdf [file 13018_2017_521_MOESM4_ESM.pdf]

**Additional file 4** Characteristics and risk of bias assessment of studies

**Characteristics of included studies**

1. Cerza 2012

|                                                             |                                                                                                                                                                                                                                                                                                                                                                                                                                                                                                                             |
|-------------------------------------------------------------|-----------------------------------------------------------------------------------------------------------------------------------------------------------------------------------------------------------------------------------------------------------------------------------------------------------------------------------------------------------------------------------------------------------------------------------------------------------------------------------------------------------------------------|
| Study type<br>Country<br>Treatment<br>Conflicts of interest | 2-arm RCT<br>Single centre, Italy<br>PRP versus Hyaluronic Acid<br>No                                                                                                                                                                                                                                                                                                                                                                                                                                                       |
| Participants                                                | Mean age: PRP 66.5y, HA 66.2y<br>%Female: PRP 58%, HA 53%<br>Mean disease duration: NR<br>Number randomized: 120<br>Follow-up: 4, 12 and 24 weeks<br><u>Inclusion:</u><br>Age: NR<br>Duration clinical symptoms: NR<br>Symptomatic OA of knee, radiological<br><b>Kellgren Lawrence</b> grade I-III<br><u>Baseline values:</u><br>Kellgren Lawrence grade n(%)<br>I: PRP 21(35%), HA 25(42%)<br>II: PRP 24(40%), HA 22(37%)<br>III: PRP 15(25%), HA 13(21%)<br>WOMAC score mean (SD)<br>Total: PRP 79.6(9.5), HA 75.4(10.7) |
| Intervention                                                | Intervention (n=60):<br>4 PRP (ACP) (type <i>LP-PRP</i> ) intra-articular injections<br>Dose: 5.5 mL<br>Interval: weekly<br>Comparison (n=60)<br>4 HA (Hyalgan) intra-articular injections<br>Dose: 20mg/2mL<br>Interval: weekly                                                                                                                                                                                                                                                                                            |
| Outcomes                                                    | Primary outcome:<br>WOMAC total score (0-96)<br>Adverse events                                                                                                                                                                                                                                                                                                                                                                                                                                                              |
| Results                                                     | WOMAC total score mean (SD)<br>4 weeks: PRP 49.6 (17.7), HA 55.2 (12.3), P<0.001<br>12 weeks: PRP 39.1 (17.8), HA 57 (11.7), P<0.001<br>24 weeks: PRP 36.5 (17.9), HA 65.1 (10.6), P<0.001<br>Adverse events:<br>No short time side effects observed                                                                                                                                                                                                                                                                        |

Risk of bias

| Bias                                            | Authors' judgement | Support for judgement                                                                                                                                                                         |
|-------------------------------------------------|--------------------|-----------------------------------------------------------------------------------------------------------------------------------------------------------------------------------------------|
| Random sequence generation (selection bias)     | High risk          | Quote: "patients were consecutively randomized... by their admission to our hospital"<br>Comment: Inappropriate                                                                               |
| Allocation concealment (selection bias)         | High risk          | Quote: "patients were consecutively randomized... by their admission to our hospital"<br>Comment: Probably not done                                                                           |
| Blinding of participants (performance bias)     | High risk          | Quote: "Groups allocated to the treatment with ACP underwent herochromocytometric examination"<br>Comment: Difficult to blind participants due to the difference in pre-treatment examination |
| Blinding of personnel (performance bias)        | High risk          | Quote: "The injections were performed by the unblinded physicians"<br>Comment: Probably not done                                                                                              |
| Blinding of outcome assessment (detection bias) | Unclear risk       | Comment: Insufficient information                                                                                                                                                             |
| Incomplete outcome data (attrition bias)        | Low risk           | Number of allocated and analysed participants were reported. No patients withdrew or were excluded from analysis.                                                                             |
| Selective reporting (reporting bias)            | Low risk           | Pre-specified outcomes were reported.                                                                                                                                                         |
| Other bias                                      | Low risk           | Power analysis were calculated.<br>Comment: unable to find other sources of bias                                                                                                              |

## 2. Duymus 2016

|                       |                            |
|-----------------------|----------------------------|
| Study type            | 3-arm RCT                  |
| Country               | Single centre, Turkey      |
| Treatment             | PRP versus HA versus Ozone |
| Conflicts of interest | NR                         |

|              |                                                                                                                                                                                                                                                                                                                                                                                                                                                                                                                                                                                                                                                                                                                                                                                                                                                                              |
|--------------|------------------------------------------------------------------------------------------------------------------------------------------------------------------------------------------------------------------------------------------------------------------------------------------------------------------------------------------------------------------------------------------------------------------------------------------------------------------------------------------------------------------------------------------------------------------------------------------------------------------------------------------------------------------------------------------------------------------------------------------------------------------------------------------------------------------------------------------------------------------------------|
| Participants | <p>Mean age: PRP 60.4y, HA 60.3, Ozone 59.4<br/> %female: PRP 97%, HA 97.1%, Ozone 88.6%<br/> Mean disease duration: &gt;1y<br/> Number randomized: 120<br/> Follow-up: 1, 3, 6 and 12 months<br/> <u>Inclusion:</u><br/> Age: 47-80y<br/> BMI: &lt;30<br/> Symptomatic OA of knee, radiological<br/> <b>Kellgren Lawrence</b> grade II-III<br/> <u>Baseline values:</u><br/> Kellgren Lawrence grade n(%)<br/> II: PRP 22(66.7%), HA 24(61.8%), Ozone 23(65.8%)<br/> III: PRP 11(33.3%), HA 10(38.2%), Ozone 12(34.2%)<br/> VAS mean (SD)<br/> PRP 7.4 (1.0), HA 8.3 (0.4), Ozone 7.2 (1.1)<br/> WOMAC score mean (SD)<br/> Pain: PRP 15.4(2.0), HA 16.6(1.1), Ozone 16.0(2.7)<br/> Stiffness: PRP 6.1(0.9), HA 6.0(0.8), Ozone 6.4(1.0)<br/> Physical function: PRP 54.5(6.7), HA 54.3(1.8), Ozone 53.5(8.7)<br/> Total: PRP 76.1(9.4), HA 77.0(2.5), Ozone 76.0(11.9)</p> |
| Intervention | <p>Intervention (n=41):<br/> 2 PRP (type <i>LR-PRP</i>) intra-articular injections<br/> Dose: 5 mL<br/> Interval: monthly<br/> Comparison 1 (n=40)<br/> 1 HA (40mg fermentative HA + 10mg mannitol) intra-articular injections<br/> Dose: 40mg/2mL<br/> Comparison 2 (n=39)<br/> 4 Ozone intra-articular injections<br/> Dose: 15 mL<br/> Concentration: 30 µg/mL<br/> Interval: weekly</p>                                                                                                                                                                                                                                                                                                                                                                                                                                                                                  |
| Outcomes     | <p>Primary outcome:<br/> VAS (0-10)<br/> WOMAC pain score (0-20), stiffness score (0-8), physical function score (0-68), total score (0-96)</p>                                                                                                                                                                                                                                                                                                                                                                                                                                                                                                                                                                                                                                                                                                                              |

|         |                                                                                                                                                                                                                                                                                                                                                                                                                                                                                                                                                                                                                                                                                                                                                                                                                                                                                                                                                                                                                                                                                                                                                                                                                                                                                                                                                                                                                                                                                                                                                                                                                                                                                          |
|---------|------------------------------------------------------------------------------------------------------------------------------------------------------------------------------------------------------------------------------------------------------------------------------------------------------------------------------------------------------------------------------------------------------------------------------------------------------------------------------------------------------------------------------------------------------------------------------------------------------------------------------------------------------------------------------------------------------------------------------------------------------------------------------------------------------------------------------------------------------------------------------------------------------------------------------------------------------------------------------------------------------------------------------------------------------------------------------------------------------------------------------------------------------------------------------------------------------------------------------------------------------------------------------------------------------------------------------------------------------------------------------------------------------------------------------------------------------------------------------------------------------------------------------------------------------------------------------------------------------------------------------------------------------------------------------------------|
| Results | <p>VAS mean (SD)</p> <p>1 month: PRP 2.5(0.7), HA 2.6(1.2), Ozone 3.5(1.5), P&lt;0.001</p> <p>3 months: PRP 2.9(0.7), HA 3.1(0.9), Ozone 5.7(1.2), P&lt;0.001</p> <p>6 months: PRP 4.0(1.3), HA 4.3(1.3), Ozone 7.3(1.0), P&lt;0.001</p> <p>12 months: PRP 5.1(1.3), HA 6.8(0.1), Ozone 7.6(1.1), P&lt;0.001</p> <p>WOMAC pain score mean (SD)</p> <p>1 month: PRP 6.8(1.8), HA 6.1(2.4), Ozone 6.6(3.5), P&gt;0.05</p> <p>3 months: PRP 7.2(2.4), HA 7 (1.7), Ozone 11.1(3.4), P&lt;0.001</p> <p>6 months: PRP 9.4(1.7), HA 9.7(1.6), Ozone 16.0(2.9), P&lt;0.001</p> <p>12 months: PRP 11.4(2.4), HA 14.2(1.1), Ozone 16.2(2.8), P&lt;0.001</p> <p>WOMAC stiffness score mean (SD)</p> <p>1 month: PRP 2.8(0.8), HA 2.7(1.1), Ozone 2.7(1.6), P&gt;0.05</p> <p>3 months: PRP 3.0(1.1), HA 3.2(1.0), Ozone 4.2(1.3), P&gt;0.05</p> <p>6 months: PRP 3.6(0.7), HA 3.8(1.1), Ozone 6.4(1.0), P&lt;0.001</p> <p>12 months: PRP 4.7(1.2), HA 5.4(0.7), Ozone 6.5(0.1), P&lt;0.001</p> <p>WOMAC physical function score mean (SD)</p> <p>1 month: PRP 19.7(7.1), HA 24.3(9.5), Ozone 21.7(8.6), P&gt;0.05</p> <p>3 months: PRP 22(5.4), HA 25.1(8.9), Ozone 38.7(12.2), P&lt;0.001</p> <p>6 months: PRP 29.6(5.7), HA 30.1(5.7), Ozone 54.1(7.3), P&lt;0.001</p> <p>12 months: PRP 38.6(7.7), HA 49.6(3.3), Ozone 54.2(7.9), P&lt;0.001</p> <p>WOMAC total score mean (SD)</p> <p>1 month: PRP 26.4(9.5), HA 33.2(12.2), Ozone 31.1(12.9), P&gt;0.05</p> <p>3 months: PRP 32.2(7.8), HA 35.3(10.5), Ozone 53.1(15.9), P&lt;0.001</p> <p>6 months: PRP 42.8(7.1), HA 44.5(6.6), Ozone 76.6(10.7), P&lt;0.001</p> <p>12 months: PRP 54.9(10.8), HA 69.3(4.3), Ozone 77.0(10.1), P&lt;0.001</p> |
|---------|------------------------------------------------------------------------------------------------------------------------------------------------------------------------------------------------------------------------------------------------------------------------------------------------------------------------------------------------------------------------------------------------------------------------------------------------------------------------------------------------------------------------------------------------------------------------------------------------------------------------------------------------------------------------------------------------------------------------------------------------------------------------------------------------------------------------------------------------------------------------------------------------------------------------------------------------------------------------------------------------------------------------------------------------------------------------------------------------------------------------------------------------------------------------------------------------------------------------------------------------------------------------------------------------------------------------------------------------------------------------------------------------------------------------------------------------------------------------------------------------------------------------------------------------------------------------------------------------------------------------------------------------------------------------------------------|

## Risk of bias

| Bias                                        | Authors' judgement | Support for judgement                                                                              |
|---------------------------------------------|--------------------|----------------------------------------------------------------------------------------------------|
| Random sequence generation (selection bias) | Low risk           | Quote: "patients were randomly assigned... by a computer-based protocol"<br>Comment: Probably done |
| Allocation concealment (selection bias)     | Unclear risk       | Comment: No information                                                                            |
| Blinding of participants (performance bias) | High risk          | Comment: Difficult to blind participants due to the difference in injection frequency and colours. |

|                                                 |              |                                                                                                                                                |
|-------------------------------------------------|--------------|------------------------------------------------------------------------------------------------------------------------------------------------|
| Blinding of personnel (performance bias)        | High risk    | Comment: Difficult to blind physicians due to the difference in injection frequency and colours.                                               |
| Blinding of outcome assessment (detection bias) | Unclear risk | Comment: No information                                                                                                                        |
| Incomplete outcome data (attrition bias)        | High risk    | Number of allocated and analysed participants were reported. Eight patients were excluded from analysis in PRP, 6 from HA, while 4 from Ozone. |
| Selective reporting (reporting bias)            | Low risk     | Pre-specified outcomes were reported.                                                                                                          |
| Other bias                                      | Low risk     | Power analysis were calculated.<br>Comment: unable to find other sources of bias                                                               |

### 3. Filardo 2015

|                                                             |                                                                                                                                                                                                                                                                                                                                                                                                                                                                                                                                                                                                                                                                                                                |
|-------------------------------------------------------------|----------------------------------------------------------------------------------------------------------------------------------------------------------------------------------------------------------------------------------------------------------------------------------------------------------------------------------------------------------------------------------------------------------------------------------------------------------------------------------------------------------------------------------------------------------------------------------------------------------------------------------------------------------------------------------------------------------------|
| Study type<br>Country<br>Treatment<br>Conflicts of interest | 2-arm RCT<br>Single centre, Italy<br>PRP versus Hyaluronic Acid<br>Yes                                                                                                                                                                                                                                                                                                                                                                                                                                                                                                                                                                                                                                         |
| Participants                                                | <p>Mean age: PRP 53.3y, HA 57.6y<br/>         %Female: PRP 36%, HA 42%<br/>         Mean disease duration: &gt; 4months<br/>         Number randomized: 192<br/>         Follow-up: 2, 6 and 12 months<br/> <u>Inclusion:</u><br/>         Age: &lt;80y<br/>         Duration clinical symptoms: &gt; 4months<br/>         Symptomatic OA of knee, radiological<br/> <b>Kellgren Lawrence</b> grade 0, I-III<br/> <u>Baseline values:</u><br/>         BMI mean (SD): PRP 26.6(4.0), HA 26.9(4.4)<br/>         Kellgren Lawrence grade mean (SD): PRP 2.0 (1.1), HA2.0 (1.1)<br/>         IKDC score mean (SD): PRP 52.4(14.1), HA 47.9(13)<br/>         Tegner score mean (SD): PRP 2.9(1.3), HA 2.8(1.3)</p> |

|              |                                                                                                                                                                                                                            |
|--------------|----------------------------------------------------------------------------------------------------------------------------------------------------------------------------------------------------------------------------|
| Intervention | Intervention (n=96):<br>3 PRP (type <i>LR-PRP</i> ) intra-articular injections<br>Dose: 5 mL<br>Interval: weekly<br>Comparison (n=96)<br>3 HA (Hyalubrix) intra-articular injections<br>Dose: 30mg/2mL<br>Interval: weekly |
| Outcomes     | IKDC subjective score (0-100)<br>KOOS score (0-100)<br>EQ-VAS (0-100)<br>Tegner score (0-10)<br>Range of motion of knee<br>Transpatellar circumference<br>Patient satisfaction<br>Adverse events                           |

|         |                                                                                                                                                                                                                                                                                                                                                                                                                                                                                                                                                                                                                                                                                                                                                                                                                                                                                                                                                                                                                                                                                                                                                                                                                                                                                                                                                                                                                                                                                                                                                                                                                                                                                                                                                                                                                                                                                                                                                                                                                                                                                                                                                                                                                                                                                                                                                  |
|---------|--------------------------------------------------------------------------------------------------------------------------------------------------------------------------------------------------------------------------------------------------------------------------------------------------------------------------------------------------------------------------------------------------------------------------------------------------------------------------------------------------------------------------------------------------------------------------------------------------------------------------------------------------------------------------------------------------------------------------------------------------------------------------------------------------------------------------------------------------------------------------------------------------------------------------------------------------------------------------------------------------------------------------------------------------------------------------------------------------------------------------------------------------------------------------------------------------------------------------------------------------------------------------------------------------------------------------------------------------------------------------------------------------------------------------------------------------------------------------------------------------------------------------------------------------------------------------------------------------------------------------------------------------------------------------------------------------------------------------------------------------------------------------------------------------------------------------------------------------------------------------------------------------------------------------------------------------------------------------------------------------------------------------------------------------------------------------------------------------------------------------------------------------------------------------------------------------------------------------------------------------------------------------------------------------------------------------------------------------|
| Results | <p>IKDC subjective score mean (SD)<br/> 2 months: PRP 63.2 (16.6), HA 63.5(15.2), P&gt;0.05<br/> 6 months: PRP 65.0(16.1), HA 63.5(17.1), P&gt;0.05<br/> 12 months: PRP 66.2(16.7), HA 64.2(18.0), P&gt;0.05</p> <p>KOOS symptom score mean (SD)<br/> 2 months: PRP 72.9 (17.0), HA 70.9(16.6), P&gt;0.05<br/> 6 months: PRP 74.7(16.9), HA 72.7(17.4), P&gt;0.05<br/> 12 months: PRP 73.9(17.2), HA 73.9(18.4), P&gt;0.05</p> <p>KOOS pain score mean (SD)<br/> 2 months: PRP 73.8 (19.9), HA 72.6(17.9), P&gt;0.05<br/> 6 months: PRP 74.7(19.3), HA 74.8(17.6), P&gt;0.05<br/> 12 months: PRP 74.9(19.3), HA 75.4(19.0), P&gt;0.05</p> <p>KOOS ADL score mean (SD)<br/> 2 months: PRP 79.0 (19.8), HA 78.0(17.9), P&gt;0.05<br/> 6 months: PRP 79.1(19.6), HA 78.4(18.6), P&gt;0.05<br/> 12 months: PRP 78.4(20.7), HA 78.4(19.3), P&gt;0.05</p> <p>KOOS sport score mean (SD)<br/> 2 months: PRP 48.0(26.1), HA 44.0(25.5), P&gt;0.05<br/> 6 months: PRP 49.6(28.6), HA 45.1(27.0), P&gt;0.05<br/> 12 months: PRP 49.3(28.6), HA 46.3(28.1), P&gt;0.05</p> <p>KOOS QOL score mean (SD)<br/> 2 months: PRP 48.4(23.1), HA 47.7(22.1), P&gt;0.05<br/> 6 months: PRP 49.2(23.4), HA 49.9(23.1), P&gt;0.05<br/> 12 months: PRP 50.8(24.0), HA 50.9(24.4), P&gt;0.05</p> <p>EQ-VAS score mean (SD)<br/> 2 months: PRP 76.3(12.7), HA 73.9(13.7), P&gt;0.05<br/> 6 months: PRP 76.2(12.9), HA 74.1(15.1), P&gt;0.05<br/> 12 months: PRP 77.6(11.1), HA 73.4(15.2), P&gt;0.05</p> <p>Tegner score mean (SD)<br/> 2 months: PRP 3.6(1.4), HA 3.3(1.5), P&gt;0.05<br/> 6 months: PRP 3.7(1.5), HA 3.5(1.5), P&gt;0.05<br/> 12 months: PRP 3.7(1.3), HA 3.4(1.5), P&gt;0.05</p> <p>Range of motion, degree mean (SD)<br/> 2 months: PRP 130.6(11.8), HA 129.0(10.9), P&gt;0.05<br/> 6 months: PRP 130.3(10.7), HA 128.0(11.4), P&gt;0.05<br/> 12 months: PRP 130.2(11.1), HA 127.4(12.0), P&gt;0.05</p> <p>Transpatellar circumference, mm mean (SD)<br/> 2 months: PRP 411.4(35.2), HA 413.3(34.1), P&gt;0.05<br/> 6 months: PRP 407.2(35.6), HA 408.7(32.5), P&gt;0.05<br/> 12 months: PRP 402.3(33.4), HA 406.4(33.6), P&gt;0.05</p> <p>Patient satisfaction rate: PRP 88.3%, HA 89.9%</p> <p>Adverse events:<br/> No severe adverse events<br/> PRP injections produced significantly more post-injection swelling and pain with respect to HA</p> |
|---------|--------------------------------------------------------------------------------------------------------------------------------------------------------------------------------------------------------------------------------------------------------------------------------------------------------------------------------------------------------------------------------------------------------------------------------------------------------------------------------------------------------------------------------------------------------------------------------------------------------------------------------------------------------------------------------------------------------------------------------------------------------------------------------------------------------------------------------------------------------------------------------------------------------------------------------------------------------------------------------------------------------------------------------------------------------------------------------------------------------------------------------------------------------------------------------------------------------------------------------------------------------------------------------------------------------------------------------------------------------------------------------------------------------------------------------------------------------------------------------------------------------------------------------------------------------------------------------------------------------------------------------------------------------------------------------------------------------------------------------------------------------------------------------------------------------------------------------------------------------------------------------------------------------------------------------------------------------------------------------------------------------------------------------------------------------------------------------------------------------------------------------------------------------------------------------------------------------------------------------------------------------------------------------------------------------------------------------------------------|

Risk of bias

| Bias                                            | Authors' judgement | Support for judgement                                                                                                                                                                                                                                            |
|-------------------------------------------------|--------------------|------------------------------------------------------------------------------------------------------------------------------------------------------------------------------------------------------------------------------------------------------------------|
| Random sequence generation (selection bias)     | Low risk           | Quote: "randomization list was provided by an independent statistician"<br>Comment: Probably done                                                                                                                                                                |
| Allocation concealment (selection bias)         | Low risk           | Quote: "sealed envelopes containing the treatment allocation"<br>Comment: Probably done                                                                                                                                                                          |
| Blinding of participants (performance bias)     | Low risk           | Quote: "syringe was appropriately covered to prevent patients from discovering the substance"<br>Further: blood was harvested from each patient<br>Comment: Probably done                                                                                        |
| Blinding of personnel (performance bias)        | High risk          | Quote: "To guarantee the double-blinding of the trial, all evaluations were performed by an independent physician not involved in the injection procedure" indicating the physicians administering the injections were not blinded<br>Comment: Probably not done |
| Blinding of outcome assessment (detection bias) | Low risk           | Quote: "To guarantee the double-blinding of the trial, all evaluations were performed by an independent physician not involved in the injection procedure"<br>Comment: Probably done                                                                             |
| Incomplete outcome data (attrition bias)        | High risk          | Number of allocated and analysed participants were reported.<br>Two patients were excluded from analysis in PRP, while 7 from HA.                                                                                                                                |
| Selective reporting (reporting bias)            | Low risk           | Pre-specified outcomes were reported.                                                                                                                                                                                                                            |
| Other bias                                      | Low risk           | Power analysis were calculated.<br>Comment: unable to find other sources of bias                                                                                                                                                                                 |

#### 4. Forogh 2015

|                       |                                |
|-----------------------|--------------------------------|
| Study type            | 2-arm RCT                      |
| Country               | Single centre, Iran            |
| Treatment             | PRP versus Corticosteroid (CS) |
| Conflicts of interest | NR                             |



|              |                                                                                                                                                                                                                                                                                                                                                                                                                                                                                                                                                                                                                                                                                                                                                                                                                                                                                                                                                                                                                                                                                                                                                                                                                                                                    |
|--------------|--------------------------------------------------------------------------------------------------------------------------------------------------------------------------------------------------------------------------------------------------------------------------------------------------------------------------------------------------------------------------------------------------------------------------------------------------------------------------------------------------------------------------------------------------------------------------------------------------------------------------------------------------------------------------------------------------------------------------------------------------------------------------------------------------------------------------------------------------------------------------------------------------------------------------------------------------------------------------------------------------------------------------------------------------------------------------------------------------------------------------------------------------------------------------------------------------------------------------------------------------------------------|
| Participants | <p>Mean age: PRP 59y, CS 61y<br/> %Female: PRP 71%, HA 63%<br/> Mean disease duration: NR<br/> Number randomized: 41<br/> Follow-up: 2 and 6 months<br/> <u>Inclusion:</u><br/> Age: 50-70y<br/> Duration clinical symptoms: NR<br/> Symptomatic OA of knee, radiological<br/> <b>Kellgren Lawrence</b> grade II-III<br/> <u>Baseline values:</u><br/> BMI mean (SD): PRP 28.9(2.8), HA 29.2(3.4)<br/> Kellgren Lawrence grade, n (%)<br/> II: PRP 7 (29.2%), CS 8 (33.3%)<br/> III: PRP 17 (70.8%), CS 16 (66.7%)<br/> KOOS pain score, mean (SD)<br/> PRP 45.8 (13.5), CS 52.3 (11.8)<br/> KOOS symptom score, mean (SD)<br/> PRP 55.2 (14.0), CS 54.6 (16.8)<br/> KOOS ADL score, mean (SD)<br/> PRP 51.9 (14.2), CS 46.1 (21.5)<br/> KOOS Quality of life score, mean (SD)<br/> PRP 7.4 (8.4), CS 5.1 (7.4)<br/> KOOS sport score, mean (SD)<br/> PRP 5.9 (6.8), CS 5.0 (7.1)<br/> VAS, mean (SD): PRP 81.3 (13.4), CS 77.8 (13.8)<br/> 20 meters walk test, second, mean (SD)<br/> PRP 16.33 (4.4), CS 19.34 (5.3)<br/> Active flexion, degree, mean (SD)<br/> PRP 98.6 (13.9), CS 95.6 (11.1)<br/> Passive flexion, degree, mean (SD)<br/> PRP 114.9 (13.3), CS 108.5 (9.8)<br/> Flexion contracture, degree, mean (SD)<br/> PRP 0.9 (2.4), CS 0.3 (1.2)</p> |
| Intervention | <p>Intervention (n=24 knees):<br/> 1 PRP (type LR-PRP)# intra-articular injections<br/> Dose: 5 mL<br/> Interval: not applicable<br/> Comparison (n=24 knees)<br/> 1 CS (methylprednisolone acetate) intra-articular injections<br/> Dose: 40mg/1mL<br/> Interval: not applicable</p>                                                                                                                                                                                                                                                                                                                                                                                                                                                                                                                                                                                                                                                                                                                                                                                                                                                                                                                                                                              |
| Outcomes     | <p>KOOS score (0-100)<br/> VAS (0-100)<br/> Range of motion of knee<br/> 20 meters walk test<br/> Patient satisfaction#</p>                                                                                                                                                                                                                                                                                                                                                                                                                                                                                                                                                                                                                                                                                                                                                                                                                                                                                                                                                                                                                                                                                                                                        |

|         |                                                                                                                                                                                                                                                                                                                                                                                                                                                                                                                                                                                                                                                                                                                                                                                                                                                                                                                                                                                                                                                                                                                                                                                                                                                                                                                                                                                                                                                    |
|---------|----------------------------------------------------------------------------------------------------------------------------------------------------------------------------------------------------------------------------------------------------------------------------------------------------------------------------------------------------------------------------------------------------------------------------------------------------------------------------------------------------------------------------------------------------------------------------------------------------------------------------------------------------------------------------------------------------------------------------------------------------------------------------------------------------------------------------------------------------------------------------------------------------------------------------------------------------------------------------------------------------------------------------------------------------------------------------------------------------------------------------------------------------------------------------------------------------------------------------------------------------------------------------------------------------------------------------------------------------------------------------------------------------------------------------------------------------|
| Results | <p>KOOS symptom score mean (SD)<br/> 2 months: PRP 74.1 (18.6), CS 59.4 (14.7)<br/> 6 months: PRP 78.1 (8.0), CS 58.3 (16.4)</p> <p>KOOS pain score mean (SD)<br/> 2 months: PRP 73.5 (15.0), CS 60.0(16.3)<br/> 6 months: PRP 78.0 (10.5), CS 54.4(20.4)</p> <p>KOOS ADL score mean (SD)<br/> 2 months: PRP 75.4 (13.1), CS 55.1 (20.3)<br/> 6 months: PRP 74.9 (15.0), CS 62.9 (19.1)</p> <p>KOOS sport score mean (SD)<br/> 2 months: PRP 13.3 (9.9), CS 10.6 (6.8)<br/> 6 months: PRP 11.3 (8.0), CS 11.6 (10.4)</p> <p>KOOS QOL score mean (SD)<br/> 2 months: PRP 25.4 (19.2), CS 17.6 (12.6)<br/> 6 months: PRP 30.5 (15.3), CS 17.4 (11.0)</p> <p>VAS score mean (SD)<br/> 2 months: PRP 45.1 (23.4), CS 65.3 (19.3)<br/> 6 months: PRP 44.6 (15.6), CS 72.5 (16.2)</p> <p>20 meters walk test, second, mean (SD)<br/> 2 months: PRP 14.4 (3.3), CS 17.9 (4.9)<br/> 6 months: PRP 15.6 (3.4), CS 18.2 (5.5)</p> <p>Active flexion, degree, mean (SD)<br/> 2 months: PRP 103.2 (12.2), CS 99.4 (11.3)<br/> 6 months: PRP 103.8 (12.5), CS 97.6 (10.9)</p> <p>Passive flexion, degree, mean (SD)<br/> 2 months: PRP 115.8 (13.1), CS 119.8 (47.3)<br/> 6 months: PRP 114.6 (11.3), CS 106.1 (9.8)</p> <p>Flexion contracture, degree, mean (SD)<br/> 2 months: PRP 0.9 (2.4), CS 0 (0)<br/> 6 months: PRP 0.9 (2.4), CS 0 (0)</p> <p>Patient satisfaction #<br/> PRP: 23 satisfied, 0 dissatisfied<br/> CS: 14 satisfied, 2 dissatisfied</p> |
|---------|----------------------------------------------------------------------------------------------------------------------------------------------------------------------------------------------------------------------------------------------------------------------------------------------------------------------------------------------------------------------------------------------------------------------------------------------------------------------------------------------------------------------------------------------------------------------------------------------------------------------------------------------------------------------------------------------------------------------------------------------------------------------------------------------------------------------------------------------------------------------------------------------------------------------------------------------------------------------------------------------------------------------------------------------------------------------------------------------------------------------------------------------------------------------------------------------------------------------------------------------------------------------------------------------------------------------------------------------------------------------------------------------------------------------------------------------------|

### Risk of bias

| Bias                                        | Authors' judgement | Support for judgement                                         |
|---------------------------------------------|--------------------|---------------------------------------------------------------|
| Random sequence generation (selection bias) | Low risk           | Quote: "block randomization method"<br>Comment: Probably done |
| Allocation concealment (selection bias)     | Unclear risk       | Not reported<br>Comment: Insufficient information             |

|                                                 |           |                                                                                                                                                                                                                            |
|-------------------------------------------------|-----------|----------------------------------------------------------------------------------------------------------------------------------------------------------------------------------------------------------------------------|
| Blinding of participants (performance bias)     | Low risk  | Quote: “all the syringes were prepared outside the room and covered to prevent patients from seeing the injectate”<br>Further: blood was harvested from each patient<br>Comment: Probably done                             |
| Blinding of personnel (performance bias)        | High risk | Quote: “The present study was a double-blinded trial. Patients and the assessor were unaware of the treatment group” indicating the physicians administering the injections were not blinded<br>Comment: Probably not done |
| Blinding of outcome assessment (detection bias) | Low risk  | Quote: “The present study was a double-blinded trial. Patients and the assessor were unaware of the treatment group”<br>Comment: Probably done                                                                             |
| Incomplete outcome data (attrition bias)        | High risk | Number of allocated and analysed participants were reported.<br>One patients were excluded from analysis in PRP, while 6 from CS.                                                                                          |
| Selective reporting (reporting bias)            | Low risk  | Pre-specified outcomes were reported.                                                                                                                                                                                      |
| Other bias                                      | High risk | Power analysis were not calculated.<br>It seemed that the knees rather than the number of patients were randomized.                                                                                                        |

## 5. Görmeli 2015

|                       |                                               |
|-----------------------|-----------------------------------------------|
| Study type            | 4-arm RCT                                     |
| Country               | Single centre, Turkey                         |
| Treatment             | PRP versus PRP+saline versus HA versus Saline |
| Conflicts of interest | No                                            |

|              |                                                                                                                                                                                                                                                                                                                                                                                                                                                                                                                                                                                                                                                                                                                                                                                                                                                                                                                                                                                    |
|--------------|------------------------------------------------------------------------------------------------------------------------------------------------------------------------------------------------------------------------------------------------------------------------------------------------------------------------------------------------------------------------------------------------------------------------------------------------------------------------------------------------------------------------------------------------------------------------------------------------------------------------------------------------------------------------------------------------------------------------------------------------------------------------------------------------------------------------------------------------------------------------------------------------------------------------------------------------------------------------------------|
| Participants | <p>Mean age: 53.5y (range 27-84y)<br/> %female: 55.6%<br/> BMI: 29.1 (range 19.8-38)<br/> Mean disease duration: &gt; 4 months<br/> Number randomized: 182<br/> Follow-up: 6 weeks, 3 and 6 months<br/> <u>Inclusion:</u><br/> Age: NR<br/> BMI: &lt;30<br/> Symptomatic OA of knee, radiological<br/> <b>Kellgren Lawrence</b> grade I-IV<br/> <u>Baseline values:</u><br/> Mean age: PRP 53.7y, PRP+saline 53.8y, HA 53.5y, Saline 52.8y<br/> %female: PRP 58.9%, PRP+saline 56.8%, HA 56.4%, Saline 50%<br/> BMI: PRP 28.7, PRP+saline 28.4, HA 29.7, Saline 29.5<br/> Kellgren Lawrence grade n(%)<br/> I-III: PRP 26(66.7%), PRP+saline 30(68.1%), HA 25(64.1%), Saline 27(67.5%)<br/> IV: PRP 13(33.3%), PRP+saline 14(31.8%), HA 14(35.8%), Saline 13(32.5%)<br/> EQ-VAS mean (SD)<br/> PRP 50.3(5.2), PRP+saline 50.3(5.8), HA 50.5(4.6), Saline 50.2(4.5)<br/> IKDC subjective score mean (SD)<br/> PRP 40.4(5), PRP+saline 41.2(6.1), HA 40.6(4.5), Saline 40.4(4.3)</p> |
| Intervention | <p>Intervention (n=46):<br/> 3 PRP (type <i>LR-PRP</i>) intra-articular injections<br/> Dose: 5 mL<br/> Interval: monthly<br/> Comparison 1 (n=45)<br/> 1 PRP + 2 saline intra-articular injections<br/> Dose: NR<br/> Interval: weekly<br/> Comparison 2 (n=46)<br/> 3 HA (Orthovisc) intra-articular injections<br/> Dose: 30mg/2mL<br/> Interval: weekly<br/> Comparison 3 (n=45)<br/> 3 Saline intra-articular injections<br/> Dose: NR<br/> Interval: weekly</p>                                                                                                                                                                                                                                                                                                                                                                                                                                                                                                              |
| Outcomes     | <p>EQ-VAS (0-100)<br/> IKDC subjective score (0-100)<br/> Adverse events<br/> Patient satisfaction (satisfied, partially satisfied, not satisfied)</p>                                                                                                                                                                                                                                                                                                                                                                                                                                                                                                                                                                                                                                                                                                                                                                                                                             |

|         |                                                                                                                                                                                                                                                                                                                                                                                                                                                                                                                                                                                                                                                                                                                                                                                                                                                                |
|---------|----------------------------------------------------------------------------------------------------------------------------------------------------------------------------------------------------------------------------------------------------------------------------------------------------------------------------------------------------------------------------------------------------------------------------------------------------------------------------------------------------------------------------------------------------------------------------------------------------------------------------------------------------------------------------------------------------------------------------------------------------------------------------------------------------------------------------------------------------------------|
| Results | <p>EQ-VAS mean (SD)</p> <p>6 months: PRP 71.4(10.8), PRP+saline 62.0(6.3), HA 60.8(7.2), Saline 48.0(5.1)</p> <p>I-III: PRP 78.2(4.9), PRP+saline 64.7(5.0), HA 64.0(6.0), Saline 48.4(5.1)</p> <p>IV: PRP 57.8(4.2), PRP+saline 56.4(5.1), HA 55.1(5.4), Saline 47.2(5.0)</p> <p>IKDC subjective score mean (SD)</p> <p>6 months: PRP 60.8(9.8), PRP+saline 50.2(6.7), HA 48.4(6.2), Saline 36.5(4.8)</p> <p>I-III: PRP 66.9(4.9), PRP+saline 52.4(6.3), HA 50.7(5.6), Saline 36.6(5.4)</p> <p>IV: PRP 48.6(3.7), PRP+saline 45.5(5.0), HA 44.4(5.3), Saline 36.3(3.5)</p> <p>Adverse events: NR</p> <p>Patient satisfaction rate</p> <p>satisfied: PRP 76.9%, PRP+saline 72.7%, HA 64.1%, Saline 5%</p> <p>partially satisfied: PRP 12.8%, PRP+saline 18.2%, HA 23.1%, Saline 15%</p> <p>not satisfied: PRP 10.3%, PRP+saline 9.1%, HA 12.8%, Saline 80%</p> |
|---------|----------------------------------------------------------------------------------------------------------------------------------------------------------------------------------------------------------------------------------------------------------------------------------------------------------------------------------------------------------------------------------------------------------------------------------------------------------------------------------------------------------------------------------------------------------------------------------------------------------------------------------------------------------------------------------------------------------------------------------------------------------------------------------------------------------------------------------------------------------------|

## Risk of bias

| Bias                                            | Authors' judgement | Support for judgement                                                                                                                                         |
|-------------------------------------------------|--------------------|---------------------------------------------------------------------------------------------------------------------------------------------------------------|
| Random sequence generation (selection bias)     | Low risk           | Quote: "patients were randomly assigned into four groups by a computer-derived protocol"<br>Comment: Probably done                                            |
| Allocation concealment (selection bias)         | Low risk           | Quote: "group assignments were only accessible to the study assistant and concealed from the patients and researchers"<br>Comment: Probably done              |
| Blinding of participants (performance bias)     | Low risk           | Quote: "participants were blinded, subjected to a standardized IA injection protocol"<br>Further: blood was drawn from all patients<br>Comment: Probably done |
| Blinding of personnel (performance bias)        | High risk          | Quote: "each injection was performed by an unblinded physician"                                                                                               |
| Blinding of outcome assessment (detection bias) | Low risk           | Quote: "The patients were evaluated ... by the clinician who was blinded to the patients and the content of the injections"<br>Comment: Probably done         |

|                                          |           |                                                                                                                                                                       |
|------------------------------------------|-----------|-----------------------------------------------------------------------------------------------------------------------------------------------------------------------|
| Incomplete outcome data (attrition bias) | High risk | Number of allocated and analysed participants were reported.<br>Seven patients were excluded from analysis in PRP, 1 from PRP+saline, 7 from HA, while 5 from Saline. |
| Selective reporting (reporting bias)     | High risk | Not all pre-specified outcomes were reported.<br>Adverse events were not reported.                                                                                    |
| Other bias                               | Low risk  | Power analysis were calculated.<br>Comment: unable to find other sources of bias                                                                                      |

## 6. Li 2011

|                                                             |                                                                                                                                                                                                                                                                                                                                                                                                                                                                                                                                                                                                                                                                                                                                        |
|-------------------------------------------------------------|----------------------------------------------------------------------------------------------------------------------------------------------------------------------------------------------------------------------------------------------------------------------------------------------------------------------------------------------------------------------------------------------------------------------------------------------------------------------------------------------------------------------------------------------------------------------------------------------------------------------------------------------------------------------------------------------------------------------------------------|
| Study type<br>Country<br>Treatment<br>Conflicts of interest | 2-arm RCT<br>Single centre, China<br>PRP versus Hyaluronic Acid<br>No                                                                                                                                                                                                                                                                                                                                                                                                                                                                                                                                                                                                                                                                  |
| Participants                                                | <p>Mean age: PRP 57.6y, HA 58.2y<br/>%Female: PRP 60%, HA 53%<br/>Mean disease duration: &gt; 4months<br/>Number randomized: 30<br/>Follow-up: 3, 4 and 6 months</p> <p><u>Inclusion:</u><br/>Age: NR<br/>Duration clinical symptoms: &gt; 4 months<br/>Symptomatic OA of knee, radiological<br/><b>Kellgren Lawrence</b> grade I-IV</p> <p><u>Baseline values:</u><br/>Kellgren Lawrence grade n(%)<br/>I: PRP 6(40%), HA 6(40%)<br/>II: PRP 2(13%), HA 3(20%)<br/>III: PRP 4(27%), HA 3(20%)<br/>IV: PRP 3(20%), HA 3(20% )</p> <p>IKDC subjective score mean (SD)<br/>PRP 55.4(8.8), HA 57.5(9.4)<br/>WOMAC score mean (SD)<br/>Total: PRP 27.7(13.8), HA 30.9(13.9)<br/>Lequesne Index mean (SD)<br/>PRP 8.0(3.7), HA 9.3(2.9)</p> |

|              |                                                                                                                                                                                                                                                                                                                                                                                                                                                                                                                                                                                                                                                        |
|--------------|--------------------------------------------------------------------------------------------------------------------------------------------------------------------------------------------------------------------------------------------------------------------------------------------------------------------------------------------------------------------------------------------------------------------------------------------------------------------------------------------------------------------------------------------------------------------------------------------------------------------------------------------------------|
| Intervention | Intervention (n=15):<br>3 PRP (type <i>LR-PRP</i> ) intra-articular injections<br>Dose: 3.5 mL<br>Interval: triweekly<br>Comparison (n=15)<br>3 HA (Hyalgan) intra-articular injections<br>Dose: 2mL<br>Interval: triweekly                                                                                                                                                                                                                                                                                                                                                                                                                            |
| Outcomes     | IKDC subjective score (0-100)<br>WOMAC total score (0-96)<br>Lequesne index (0-24)<br>Adverse events                                                                                                                                                                                                                                                                                                                                                                                                                                                                                                                                                   |
| Results      | IKDC subjective score mean (SD)<br>3 months: PRP 71.3 (12.5), HA 70.1 (12.5), P=0.78<br>4 months: PRP 75.9 (13.5), HA 73.1 (9.9), P=0.52<br>6 months: PRP 76.4 (13.5), HA 63.2 (11.9), P<0.01<br>WOMAC total score mean (SD)<br>3 months: PRP 13.3 (9.4), HA 13.8 (4.7), P=0.85<br>4 months: PRP 12.9 (9.7), HA 12.5 (6.6), P=0.90<br>6 months: PRP 10.7 (9.9), HA 20.6 (8.3), P=0.01<br>Lequesne index mean (SD)<br>3 months: PRP 4.8 (2.4), HA 4.7 (2.0), P=0.87<br>4 months: PRP 3.3 (1.2), HA 3.7 (1.2), P=0.37<br>6 months: PRP 3.1 (1.0), HA 6.6 (2.1), P<0.01<br>Adverse events:<br>PRP 12 patients 31 injections, HA 12 patients 30 injections |

#### Risk of bias\*

| Bias                                            | Authors' judgement | Support for judgement                                                                             |
|-------------------------------------------------|--------------------|---------------------------------------------------------------------------------------------------|
| Random sequence generation (selection bias)     | Low risk           | Reply: "randomization was performed according to a random number chart"<br>Comment: Probably done |
| Allocation concealment (selection bias)         | High risk          | Reply: "Allocation concealment was not performed"                                                 |
| Blinding of participants (performance bias)     | High risk          | Reply: "No"                                                                                       |
| Blinding of personnel (performance bias)        | High risk          | Reply: "No"                                                                                       |
| Blinding of outcome assessment (detection bias) | Low risk           | Reply: "Yes"                                                                                      |

|                                          |              |                                                                                                                   |
|------------------------------------------|--------------|-------------------------------------------------------------------------------------------------------------------|
| Incomplete outcome data (attrition bias) | Low risk     | Number of allocated and analyzed participants were reported. No patients withdrew or were excluded from analysis. |
| Selective reporting (reporting bias)     | Low risk     | All pre-specified outcomes were reported.                                                                         |
| Other bias                               | Unclear risk | Reply: "Power analysis were calculated"<br>Comment: the sample size was very small                                |

## 7. Montañez-Heredia 2016

|                                                             |                                                                                                                                                                                                                                                                                                                                                                                                                                                                                                                                                                                                             |
|-------------------------------------------------------------|-------------------------------------------------------------------------------------------------------------------------------------------------------------------------------------------------------------------------------------------------------------------------------------------------------------------------------------------------------------------------------------------------------------------------------------------------------------------------------------------------------------------------------------------------------------------------------------------------------------|
| Study type<br>Country<br>Treatment<br>Conflicts of interest | 2-arm RCT<br>Single centre, Spain<br>PRP versus Hyaluronic Acid<br>No                                                                                                                                                                                                                                                                                                                                                                                                                                                                                                                                       |
| Participants                                                | <p>Mean age: PRP 66.3 ± 8.3y, HA 61.5 ± 8.6y<br/>         %Female: PRP 55.6%, HA 65.4%<br/>         Mean disease duration: NR<br/>         Number randomized: 55<br/>         Follow-up: 3 and 6 months<br/> <u>Inclusion:</u><br/>         Age: 40-80y<br/>         Duration clinical symptoms: NR<br/>         Symptomatic OA of knee, radiological<br/> <b>Kellgren Lawrence</b> grade I-III<br/> <u>Baseline values:</u><br/>         Kellgren Lawrence grade n(%)<br/>         I: PRP 5(18.5%), HA 2(7.7%)<br/>         II: PRP 10(37%), HA 9(34.6%)<br/>         III: PRP 12(44.4%), HA 15(57.7%)</p> |
| Intervention                                                | <p>Intervention (n=28):<br/>         3 PRP (type <i>LP-PRP</i>) intra-articular injections<br/>         Dose: NR<br/>         Interval: 15 days<br/>         Comparison (n=27)<br/>         3 HA (Adant) intra-articular injections<br/>         Dose: NR<br/>         Interval: 15 days</p>                                                                                                                                                                                                                                                                                                                |
| Outcomes                                                    | <p>KOOS score (0-100)<br/>         VAS<br/>         EUROQOL(European Quality of Life)<br/>         Adverse events</p>                                                                                                                                                                                                                                                                                                                                                                                                                                                                                       |



|         |                                                                                                                                                                                                                                                                                                                                                                                                                                                                                                                                                                                                         |
|---------|---------------------------------------------------------------------------------------------------------------------------------------------------------------------------------------------------------------------------------------------------------------------------------------------------------------------------------------------------------------------------------------------------------------------------------------------------------------------------------------------------------------------------------------------------------------------------------------------------------|
| Results | <p>KOOS: No data provided.</p> <p>VAS at 3 months compared to baseline<br/>Number of 50% decrease: PRP 15, HA 8</p> <p>VAS at 6 months compared to baseline<br/>Number of 50% decrease: PRP 12, HA 11</p> <p>EUROQOL at 3 months compared to baseline<br/>Number of worsening: PRP 1, HA 3<br/>Number of similar: PRP 13, HA 14<br/>Number of improvement: PRP 13, HA 9</p> <p>EUROQOL at 6 months compared to baseline<br/>Number of worsening: PRP 2, HA 4<br/>Number of similar: PRP 13, HA 13<br/>Number of improvement: PRP 12, HA 9</p> <p>Adverse events<br/>number of patients: PRP 9, HA 4</p> |
|---------|---------------------------------------------------------------------------------------------------------------------------------------------------------------------------------------------------------------------------------------------------------------------------------------------------------------------------------------------------------------------------------------------------------------------------------------------------------------------------------------------------------------------------------------------------------------------------------------------------------|

### Risk of bias

| Bias                                            | Authors' judgement | Support for judgement                                                                                                                                                                   |
|-------------------------------------------------|--------------------|-----------------------------------------------------------------------------------------------------------------------------------------------------------------------------------------|
| Random sequence generation (selection bias)     | Low risk           | Quote: "Patients were assigned using a table of random numbers"<br>Comment: Probably done                                                                                               |
| Allocation concealment (selection bias)         | Unclear risk       | Not reported.<br>Comment: Insufficient information                                                                                                                                      |
| Blinding of participants (performance bias)     | Low risk           | Quote: "The patient did not know what was being infiltrated, as the syringes for both groups were opaque."<br>Further: blood was drawn from all participants.<br>Comment: Probably done |
| Blinding of personnel (performance bias)        | High risk          | Not reported. Reporting "double blinded" means blinding of participants and observers<br>Comment: Probably not done                                                                     |
| Blinding of outcome assessment (detection bias) | Low risk           | Quote: "Researchers not involved in infiltration and blinded as to which group the patients were assigned carried out patient data collection."<br>Comment: Probably done               |
| Incomplete outcome data (attrition bias)        | Low risk           | Number of allocated and analysed participants were reported. Reasons for missing data were reported. One participant was excluded for analysis in 1PRP group, and 1 from HA group.      |

|                                      |           |                                                                                  |
|--------------------------------------|-----------|----------------------------------------------------------------------------------|
| Selective reporting (reporting bias) | High risk | All pre-specified outcomes were not reported.                                    |
| Other bias                           | Low risk  | Power analysis were calculated.<br>Comment: unable to find other sources of bias |

## 8. Patel 2013

|                                                             |                                                                                                                                                                                                                                                                                                                                                                                                                                                                                                                                                                                                                                                                                                                                                                                                                                                                                                                          |
|-------------------------------------------------------------|--------------------------------------------------------------------------------------------------------------------------------------------------------------------------------------------------------------------------------------------------------------------------------------------------------------------------------------------------------------------------------------------------------------------------------------------------------------------------------------------------------------------------------------------------------------------------------------------------------------------------------------------------------------------------------------------------------------------------------------------------------------------------------------------------------------------------------------------------------------------------------------------------------------------------|
| Study type<br>Country<br>Treatment<br>Conflicts of interest | 3-arm RCT<br>Single centre, India<br>1PRP versus 2PRP versus Placebo<br>Yes                                                                                                                                                                                                                                                                                                                                                                                                                                                                                                                                                                                                                                                                                                                                                                                                                                              |
| Participants                                                | <p>Mean age: 52.8, %female: 70.7%</p> <p>Mean disease duration: NR</p> <p>Number randomized: 78 (156 knees)</p> <p>Follow-up: 6 weeks, 3 and 6 months</p> <p><u>Inclusion:</u></p> <p>Age: NR</p> <p>Duration clinical symptoms: NR</p> <p>Symptomatic OA of knee, radiological <b>Albäck</b> grade 1-3</p> <p><u>Baseline values:</u></p> <p>Albäck grade, n of knees</p> <p>1: 1PRP 37, 2PRP 36, Placebo 25</p> <p>2: 1PRP 11, 2PRP 10, Placebo 18</p> <p>3: 1PRP 2, 2PRP 2, Placebo 3</p> <p>WOMAC score mean (SD)</p> <p>Pain: 1PRP 10.17(3.82), 2PRP 10.62(3.73), Placebo 9.04(3.73)</p> <p>Stiffness: 1PRP 3.06(2.08), 2PRP 3.50(2.09), Placebo 2.70(2.02)</p> <p>Physical function: 1PRP 36.12(13.08), 2PRP 39.10(11.34), Placebo 38.80(12.44)</p> <p>Total: 1PRP 49.56(17.83), 2PRP 53.20(16.18), Placebo 45.54(17.29)</p> <p>VAS pain mean (SD)</p> <p>1PRP 4.56(0.61), 2PRP 4.64(0.56), Placebo 4.57(0.62)</p> |

|                     |                                                                                                                                                                                                                                                                                                                                                                                                                |
|---------------------|----------------------------------------------------------------------------------------------------------------------------------------------------------------------------------------------------------------------------------------------------------------------------------------------------------------------------------------------------------------------------------------------------------------|
| <p>Intervention</p> | <p>Intervention 1 (n=27/54 knees):<br/> 1 PRP (type <i>LP-PRP</i>) intra-articular injections<br/> Dose: 8 mL<br/> Interval: not applicable<br/> Intervention 2 (n=25/50 knees)<br/> 2 PRP (type <i>LP-PRP</i>) intra-articular injections<br/> Dose: 8 mL<br/> Interval: triweekly<br/> Comparison (n=23/46 knees)<br/> 1 saline intra-articular injections<br/> Dose: 8 mL<br/> Interval: not applicable</p> |
| <p>Outcomes</p>     | <p>Primary outcome:<br/> WOMAC subscale pain (0-20)<br/> Secondary outcome:<br/> VAS (0-10)<br/> WOMAC stiffness score (0-8), physical function score (0-68),<br/> total score (0-96)<br/> Patient satisfaction (%) (satisfied, partly satisfied, not satisfied)<br/> Adverse events</p>                                                                                                                       |

|         |                                                                                                                                                                                                                                                                                                                                                                                                                                                                                                                                                                                                                                                                                                                                                                                                                                                                                                                                                                                                                                                                                                                                                                                                                                                                                                                                                                                                                                                    |
|---------|----------------------------------------------------------------------------------------------------------------------------------------------------------------------------------------------------------------------------------------------------------------------------------------------------------------------------------------------------------------------------------------------------------------------------------------------------------------------------------------------------------------------------------------------------------------------------------------------------------------------------------------------------------------------------------------------------------------------------------------------------------------------------------------------------------------------------------------------------------------------------------------------------------------------------------------------------------------------------------------------------------------------------------------------------------------------------------------------------------------------------------------------------------------------------------------------------------------------------------------------------------------------------------------------------------------------------------------------------------------------------------------------------------------------------------------------------|
| Results | <p>WOMAC pain score mean (SD)#<br/> 6 weeks: 1PRP 4.26(4.6), 2PRP 4.38(4.2), Placebo 9.48(4.0)<br/> 3 months: 1PRP 3.74(5.0), 2PRP 4.88(5.4), Placebo 10.35(3.9)<br/> 6 months: 1PRP 5.0(5.8), 2PRP 6.18(6.0), Placebo 10.87(4.0)</p> <p>WOMAC stiffness score mean (SD)#<br/> 6 weeks: 1PRP 2.12(1.7), 2PRP 2.28(2.1), Placebo 2.76(2.1)<br/> 3 months: 1PRP 1.76(1.8), 2PRP 2.00(2.0), Placebo 2.91(2.0)<br/> 6 months: 1PRP 2.10(2.0), 2PRP 1.88(2.1), Placebo 2.76(1.9)</p> <p>WOMAC physical function score mean (SD)#<br/> 6 weeks: 1PRP 18.98(14.6), 2PRP 18.30(14.2), Placebo 34.54(13.5)<br/> 3 months: 1PRP 16.98(15.7), 2PRP 18.82(17.2), Placebo 37.43(13.6)<br/> 6 months: 1PRP 20.08(17.8), 2PRP 22.40(18.3), Placebo 39.46(13.0)</p> <p>WOMAC total score mean (SD)#<br/> 6 weeks: 1PRP 25.36(20.5), 2PRP 24.96(19.9), Placebo 46.78(18.5)<br/> 3 months: 1PRP 22.48(22.1), 2PRP 25.70(24.1), Placebo 50.70(18.4)<br/> 6 months: 1PRP 27.18(24.9), 2PRP 30.48(25.9), Placebo 53.09(17.9)</p> <p>VAS pain score mean (SD)<br/> 6 months: 1PRP 2.16(1.5), 2PRP 2.54(1.7), Placebo 4.61(0.7)</p> <p>Patient satisfaction<br/> satisfied rate %<br/> 6 months: 1PRP 67.3%, 2PRP 64%, Placebo 4.3%<br/> partly satisfied rate %<br/> 6 months: 1PRP 7.7%, 2PRP 4%, Placebo 6.5%<br/> not satisfied rate %<br/> 6 months: 1PRP 25%, 2PRP 25%, Placebo 89.1%</p> <p>Adverse events<br/> number of patients: 1PRP 6, 2PRP 11, Placebo 0</p> |
|---------|----------------------------------------------------------------------------------------------------------------------------------------------------------------------------------------------------------------------------------------------------------------------------------------------------------------------------------------------------------------------------------------------------------------------------------------------------------------------------------------------------------------------------------------------------------------------------------------------------------------------------------------------------------------------------------------------------------------------------------------------------------------------------------------------------------------------------------------------------------------------------------------------------------------------------------------------------------------------------------------------------------------------------------------------------------------------------------------------------------------------------------------------------------------------------------------------------------------------------------------------------------------------------------------------------------------------------------------------------------------------------------------------------------------------------------------------------|

### Risk of bias

| Bias                                        | Authors' judgement | Support for judgement                                                                                   |
|---------------------------------------------|--------------------|---------------------------------------------------------------------------------------------------------|
| Random sequence generation (selection bias) | Low risk           | Quote: "participants were randomly divided by computer-derived random charts"<br>Comment: Probably done |
| Allocation concealment (selection bias)     | Unclear risk       | Not reported.<br>Comment: Insufficient information                                                      |

|                                                 |              |                                                                                                                                                                                                                                                                     |
|-------------------------------------------------|--------------|---------------------------------------------------------------------------------------------------------------------------------------------------------------------------------------------------------------------------------------------------------------------|
| Blinding of participants (performance bias)     | Unclear risk | Quote: “participants were blinded and subjected to a standardized injection protocol”<br>Further: blood was drawn from all participants.<br>However, the difference in injection times among groups make the blinding difficult.<br>Comment: inadequate information |
| Blinding of personnel (performance bias)        | High risk    | Not reported. Reporting “double blinded” means blinding of participants and observers<br>Comment: Probably not done                                                                                                                                                 |
| Blinding of outcome assessment (detection bias) | Low risk     | Quote: “...by a blinded observer”<br>Comment: Probably done                                                                                                                                                                                                         |
| Incomplete outcome data (attrition bias)        | High risk    | Number of allocated and analysed participants were reported. Reasons for missing data were reported. One participant was excluded for analysis in 1PRP group, while 3 from Placebo group.                                                                           |
| Selective reporting (reporting bias)            | Low risk     | Pre-specified outcomes were reported.<br>Further information was obtained by email.                                                                                                                                                                                 |
| Other bias                                      | Low risk     | Power analysis were calculated.<br>Comment: unable to find other sources of bias                                                                                                                                                                                    |

## 9. Paterson 2016

|                       |                            |
|-----------------------|----------------------------|
| Study type            | 2-arm RCT                  |
| Country               | Single centre, Australia   |
| Treatment             | PRP versus Hyaluronic Acid |
| Conflicts of interest | No                         |

|              |                                                                                                                                                                                                                                                                                                                                                                                                                                                                                                                                                                                                                                                                                                                                                                                                                                                                                                                                                                                                                                                              |
|--------------|--------------------------------------------------------------------------------------------------------------------------------------------------------------------------------------------------------------------------------------------------------------------------------------------------------------------------------------------------------------------------------------------------------------------------------------------------------------------------------------------------------------------------------------------------------------------------------------------------------------------------------------------------------------------------------------------------------------------------------------------------------------------------------------------------------------------------------------------------------------------------------------------------------------------------------------------------------------------------------------------------------------------------------------------------------------|
| Participants | <p>Mean age: PRP 49.9y, HA 52.7y<br/> %Female: PRP 27%, HA 30%<br/> Mean disease duration: NR<br/> Number randomized: 23<br/> Follow-up: 4 and 12 weeks<br/> <u>Inclusion:</u><br/> Age: NR<br/> Duration clinical symptoms: NR<br/> Symptomatic OA of knee, radiological<br/> <b>Kellgren Lawrence</b> grade II-III<br/> <u>Baseline values:</u><br/> Kellgren Lawrence grade n(%): NR<br/> VAS score mean (SD): PRP 48.09(23.75), HA 39.70(21.90)<br/> KOOS score mean (SD)<br/> Symptoms: PRP 48.70 (15.83), HA 62.14 (17.99)<br/> Pain: PRP 57.07 (11.21), HA 70.00 (11.25)<br/> Function: PRP 70.72 (13.64), HA 75.44 (12.42)<br/> Sport: PRP 31.82 (20.40), HA 47.00 (28.69)<br/> QoL: PRP 30.11 (18.92), HA 41.87 (13.51)<br/> KQoL score mean (SD)<br/> Physical: PRP 57.72 (18.35), HA 71.16 (14.91)<br/> Activity: PRP 59.09 (23.33), HA 75.50 (15.71)<br/> Emotional: PRP 46.97 (26.69) , HA 58.75 (24.25)<br/> Functional tests mean (SD)<br/> Hops: PRP 46.64 (33.04), HA 55.50 (35.43)<br/> Knee bends: PRP 19.45 (8.25), HA 20.50 (13.23)</p> |
| Intervention | <p>Intervention (n=11):<br/> 3 PRP (type <i>LR-PRP</i>) intra-articular injections<br/> Dose: 3 mL<br/> Interval: weekly<br/> Comparison (n=10)<br/> 3 HA (Hylan) intra-articular injections<br/> Dose: 3 mL<br/> Interval: weekly</p>                                                                                                                                                                                                                                                                                                                                                                                                                                                                                                                                                                                                                                                                                                                                                                                                                       |
| Outcomes     | <p>Primary outcome:<br/> VAS (0-100)<br/> KOOS (0-100/category)<br/> KQoL<br/> Functional tests (maximum hopping distance, number of knee bends in 30s)<br/> Adverse events</p>                                                                                                                                                                                                                                                                                                                                                                                                                                                                                                                                                                                                                                                                                                                                                                                                                                                                              |

|         |                                                                                                                                                                                                                                                                                                                                                                                                                                                                                                                                                                                                                                                                                                                                                                                                                                                                                                                                                                                                                                                                                                                                                                                                                                                                                                                                                                                                                                                                                                                                                                                                                                                 |
|---------|-------------------------------------------------------------------------------------------------------------------------------------------------------------------------------------------------------------------------------------------------------------------------------------------------------------------------------------------------------------------------------------------------------------------------------------------------------------------------------------------------------------------------------------------------------------------------------------------------------------------------------------------------------------------------------------------------------------------------------------------------------------------------------------------------------------------------------------------------------------------------------------------------------------------------------------------------------------------------------------------------------------------------------------------------------------------------------------------------------------------------------------------------------------------------------------------------------------------------------------------------------------------------------------------------------------------------------------------------------------------------------------------------------------------------------------------------------------------------------------------------------------------------------------------------------------------------------------------------------------------------------------------------|
| Results | <p>VAS score mean (SD)<br/> 4 weeks: PRP 19.64 (17.61), HA 12.90 (14.06)<br/> 12 weeks: PRP 36.89 (25.42), HA 14.13 (9.30)</p> <p>KOOS symptom score mean (SD)<br/> 4 weeks: PRP 57.14 (20.33), HA 61.07 (26.86)<br/> 12 weeks: PRP 57.86 (22.76), HA 80.16 (8.40)</p> <p>KOOS pain score mean (SD)<br/> 4 weeks: PRP 71.47 (16.67), HA 67.22 (25.55)<br/> 12 weeks: PRP 68.89 (15.76), HA 79.32 (9.33)</p> <p>KOOS function score mean (SD)<br/> 4 weeks: PRP 79.27 (15.08), HA 79.12 (28.63)<br/> 12 weeks: PRP 78.68 (15.87), HA 90.03 (7.31)</p> <p>KOOS sport score mean (SD)<br/> 4 weeks: PRP 40.46 (28.32), HA 46.50 (33.75)<br/> 12 weeks: PRP 41.00 (27.77), HA 64.44 (23.64)</p> <p>KOOS QoL score mean (SD)<br/> 4 weeks: PRP 40.89 (27.55), HA 42.50 (21.21)<br/> 12 weeks: PRP 38.75 (28.38), HA 54.86 (9.77)</p> <p>KQoL physical score mean (SD)<br/> 4 weeks: PRP 65.00 (18.14), HA 68.33 (27.54)<br/> 12 weeks: PRP 68.83 (18.64), HA 80.55 (13.46)</p> <p>KQoL activity score mean (SD)<br/> 4 weeks: PRP 72.73 (16.79), HA 78.50 (29.16)<br/> 12 weeks: PRP 70.00 (22.23), HA 88.89 (7.41)</p> <p>KQoL emotional score mean (SD)<br/> 4 weeks: PRP 58.71 (23.68), HA 67.08 (29.88)<br/> 12 weeks: PRP 58.75 (29.49), HA 75.00 (16.00)</p> <p>Functional tests hopps mean (SD)<br/> 4 weeks: PRP 57.64 (41.36), HA 51.50 (39.49)<br/> 12 weeks: PRP 79.33 (34.17), HA 79.25 (38.04)</p> <p>Functional tests knee bends mean (SD)<br/> 4 weeks: PRP 22.27 (8.37), HA 25.30 (16.60)<br/> 12 weeks: PRP 31.44 (7.96), HA 31.13 (15.63)</p> <p>Adverse events:<br/> 2 participants had minor pain and swelling in PRP group.</p> |
|---------|-------------------------------------------------------------------------------------------------------------------------------------------------------------------------------------------------------------------------------------------------------------------------------------------------------------------------------------------------------------------------------------------------------------------------------------------------------------------------------------------------------------------------------------------------------------------------------------------------------------------------------------------------------------------------------------------------------------------------------------------------------------------------------------------------------------------------------------------------------------------------------------------------------------------------------------------------------------------------------------------------------------------------------------------------------------------------------------------------------------------------------------------------------------------------------------------------------------------------------------------------------------------------------------------------------------------------------------------------------------------------------------------------------------------------------------------------------------------------------------------------------------------------------------------------------------------------------------------------------------------------------------------------|

### Risk of bias

| Bias                                        | Authors' judgement | Support for judgement                                                                                                     |
|---------------------------------------------|--------------------|---------------------------------------------------------------------------------------------------------------------------|
| Random sequence generation (selection bias) | Low risk           | Quote: "participants were randomly allocated ... using a computer generated randomization list"<br>Comment: Probably done |

|                                                 |           |                                                                                                                                                                                                                                                                                                                                                           |
|-------------------------------------------------|-----------|-----------------------------------------------------------------------------------------------------------------------------------------------------------------------------------------------------------------------------------------------------------------------------------------------------------------------------------------------------------|
| Allocation concealment (selection bias)         | Low risk  | Quote: "Group allocation and concealment was performed by an independent staff member not involved with the assessment of participants"<br>Comment: Probably done                                                                                                                                                                                         |
| Blinding of participants (performance bias)     | Low risk  | Quote: "This process ensured the blinding of both the patients and treating doctors"<br>Further: blood was drawn from all participants; identical looking syringe.<br>Comment: Probably done                                                                                                                                                              |
| Blinding of personnel (performance bias)        | Low risk  | Quote: "the syringe was then provided to the independent staff.....either retained or discarded the syringe containing PA-PRP depending group allocation"<br>Quote: "This process ensured the blinding of both the patients and treating doctors"<br>Further: blood was drawn from all participants; identical looking syringe.<br>Comment: Probably done |
| Blinding of outcome assessment (detection bias) | High risk | Reporting "double-blind" means blinding of participants and physicians<br>Comment: Probably not done                                                                                                                                                                                                                                                      |
| Incomplete outcome data (attrition bias)        | Low risk  | Number of allocated and analysed participants were reported. Reasons for missing data were reported. Four patients excluded for analysis were evenly spread between groups.                                                                                                                                                                               |
| Selective reporting (reporting bias)            | Low risk  | Pre-specified outcomes were reported.                                                                                                                                                                                                                                                                                                                     |
| Other bias                                      | High risk | Power analysis were not calculated and the sample size was very small.                                                                                                                                                                                                                                                                                    |

## 10. Raeissadat 2015

|                       |                            |
|-----------------------|----------------------------|
| Study type            | 2-arm RCT                  |
| Country               | Single centre, Iran        |
| Treatment             | PRP versus Hyaluronic Acid |
| Conflicts of interest | No                         |



|              |                                                                                                                                                                                                                                                                                                                                                                                                                                                                                                                                                                                                                                                                                                                                                                                                                                                                                                                                                                                                                                                                                                                                                                                                                                                                                                                                                                                                          |
|--------------|----------------------------------------------------------------------------------------------------------------------------------------------------------------------------------------------------------------------------------------------------------------------------------------------------------------------------------------------------------------------------------------------------------------------------------------------------------------------------------------------------------------------------------------------------------------------------------------------------------------------------------------------------------------------------------------------------------------------------------------------------------------------------------------------------------------------------------------------------------------------------------------------------------------------------------------------------------------------------------------------------------------------------------------------------------------------------------------------------------------------------------------------------------------------------------------------------------------------------------------------------------------------------------------------------------------------------------------------------------------------------------------------------------|
| Participants | <p>Mean age: PRP 56.8y, HA 61.1y<br/> %Female: PRP 89.6%, HA 75.8%<br/> Mean disease duration: &gt;3 months<br/> Number randomized: 160<br/> Follow-up: 4, 24 and 52 weeks<br/> <u>Inclusion:</u><br/> Age: 40-70y<br/> Duration clinical symptoms: &gt; 3 months<br/> Symptomatic OA of knee, radiological<br/> <b>Kellgren Lawrence</b> grade I-IV<br/> <u>Baseline values:</u><br/> BMI: PRP 28.2, HA 27.0<br/> Kellgren Lawrence grade %<br/> I: PRP 6%, HA 0<br/> II: PRP 44%, HA 47%<br/> III: PRP 38%, HA 37%<br/> IV: PRP 12%, HA 16%<br/> WOMAC score mean (SD)<br/> Pain: PRP 8.46(4.17), HA 6.19(3.82)<br/> Stiffness: PRP 2.24(1.76), HA 1.88(1.72)<br/> Physical function: PRP 28.91(12.63), HA 19.88(12.32)<br/> Total: PRP 39.5(17.06), HA 28.69(16.69)<br/> SF-36 mean (SD)<br/> physical functioning: PRP 37.4(24.92), HA 43.66(22.3)<br/> role limitations due to physical health: PRP 28.83(31.11), HA 28.62(36.17)<br/> pain: PRP 49.9(24.77), HA 45.45(20.5)<br/> general health: PRP 61.68(25.72), HA 61.37(19.14)<br/> PCS-36: PRP 178.14(81.00), HA 180.4(68.52)<br/> Emotional wellbeing: PRP 61.01(26.86), HA 57.74(21.24)<br/> role limitations due to emotional problems: PRP 50.64(43.46), HA 51.61(46.13)<br/> Vitality: PRP 54.25(24.95), HA 54.43(21.47)<br/> social functioning: PRP 63.31(28.41), HA 60.64(27.86)<br/> MCS-36: PRP 229.22(95.62), HA 226.43(97.39)</p> |
| Intervention | <p>Intervention (n=87):<br/> 2 PRP (type <i>LR-PRP</i>) intra-articular injections<br/> Dose: 4-6 mL<br/> Interval: 4 weeks<br/> Comparison (n=73)<br/> 3 HA (Hyalgan) intra-articular injections<br/> Dose: 20mg/2mL<br/> Interval: weekly</p>                                                                                                                                                                                                                                                                                                                                                                                                                                                                                                                                                                                                                                                                                                                                                                                                                                                                                                                                                                                                                                                                                                                                                          |
| Outcomes     | <p>Primary outcome:<br/> WOMAC total score (0-120)<br/> SF-36 (0-100/category)</p>                                                                                                                                                                                                                                                                                                                                                                                                                                                                                                                                                                                                                                                                                                                                                                                                                                                                                                                                                                                                                                                                                                                                                                                                                                                                                                                       |

|         |                                                                                                                                                                                                                                                                                                                                                                                                                                                                                                                                                                                                                                                                                                                                                                                                                                                                                                                                                                                                                                                                                                                                                                                                                                                                                                                                                                                                                              |
|---------|------------------------------------------------------------------------------------------------------------------------------------------------------------------------------------------------------------------------------------------------------------------------------------------------------------------------------------------------------------------------------------------------------------------------------------------------------------------------------------------------------------------------------------------------------------------------------------------------------------------------------------------------------------------------------------------------------------------------------------------------------------------------------------------------------------------------------------------------------------------------------------------------------------------------------------------------------------------------------------------------------------------------------------------------------------------------------------------------------------------------------------------------------------------------------------------------------------------------------------------------------------------------------------------------------------------------------------------------------------------------------------------------------------------------------|
| Results | <p>WOMAC pain score mean (SD)<br/>52 weeks: PRP 4.03 (3.36), HA 5.08 (3.71), P&lt;0.001</p> <p>WOMAC stiffness score mean (SD)<br/>52 weeks: PRP 1.19 (1.4), HA 2.14 (1.66), P&lt;0.001</p> <p>WOMAC physical function score mean (SD)<br/>52 weeks: PRP 13.19 (10.39), HA 19.51 (11.9), P&lt;0.001</p> <p>WOMAC total score mean (SD)<br/>52 weeks: PRP 18.44 (14.35), HA 27.46 (16.36), P&lt;0.001</p> <p>SF-36 physical functioning mean (SD)<br/>52 weeks: PRP 56.82 (25.68), HA 44.29 (28.14), P&lt;0.001</p> <p>SF-36 role-physical mean (SD)<br/>52 weeks: PRP 53.98 (38.84), HA 33.46 (41.96), P&lt;0.001</p> <p>SF-36 bodily pain mean (SD)<br/>52 weeks: PRP 77.11 (19.56), HA 53.56 (27.89), P&lt;0.001</p> <p>SF-36 general health mean (SD)<br/>52 weeks: PRP 68.60 (18.75), HA 60.73 (26.70), P&lt;0.001</p> <p>SF-36 PCS-36 mean (SD)<br/>52 weeks: PRP 255.96 (77.59), HA 189.39 (103.73), P&lt;0.001</p> <p>SF-36 vitality mean (SD)<br/>52 weeks: PRP 63.14 (26.66), HA 54.61 (26.07), P&lt;0.001</p> <p>SF-36 social functioning mean (SD)<br/>52 weeks: PRP 79.38 (21.63), 63.3 (32.55), P&lt;0.001</p> <p>SF-36 role-emotional mean (SD)<br/>52 weeks: PRP 45.19 (39.03), HA 45.19 (39.03), P=0.217</p> <p>SF-36 mental health mean (SD)<br/>52 weeks: PRP 70.25 (25.24), HA 56.45 (24.49), P&lt;0.001</p> <p>SF-36 MCS-36 mean (SD)<br/>52 weeks: PRP 6269.92 (91.48) , HA 216.91 (100.9), P=0.002</p> |
|---------|------------------------------------------------------------------------------------------------------------------------------------------------------------------------------------------------------------------------------------------------------------------------------------------------------------------------------------------------------------------------------------------------------------------------------------------------------------------------------------------------------------------------------------------------------------------------------------------------------------------------------------------------------------------------------------------------------------------------------------------------------------------------------------------------------------------------------------------------------------------------------------------------------------------------------------------------------------------------------------------------------------------------------------------------------------------------------------------------------------------------------------------------------------------------------------------------------------------------------------------------------------------------------------------------------------------------------------------------------------------------------------------------------------------------------|

## Risk of bias

| Bias                                            | Authors' judgement | Support for judgement                                                                            |
|-------------------------------------------------|--------------------|--------------------------------------------------------------------------------------------------|
| Random sequence generation (selection bias)     | Low risk           | Quote: "by using random numbers table"<br>Comment: Probably done                                 |
| Allocation concealment (selection bias)         | Unclear risk       | Not reported<br>Comment: Insufficient information                                                |
| Blinding of participants (performance bias)     | High risk          | Quote: "Our study limitations include ..... not being blind ....."<br>Comment: Probably not done |
| Blinding of personnel (performance bias)        | High risk          | Quote: "Our study limitations include ..... not being blind ....."<br>Comment: Probably not done |
| Blinding of outcome assessment (detection bias) | High risk          | Quote: "Our study limitations include ..... not being blind ....."<br>Comment: Probably not done |

|                                          |           |                                                                                                                                                                                                         |
|------------------------------------------|-----------|---------------------------------------------------------------------------------------------------------------------------------------------------------------------------------------------------------|
| Incomplete outcome data (attrition bias) | Low risk  | Number of allocated and analyzed participants were reported. Reasons for missing data were reported and similar between groups. Ten patients excluded for analysis in PRP group while 11 from HA group. |
| Selective reporting (reporting bias)     | High risk | Not all pre-specified outcomes were reported. Results at 4 and 24 weeks were not reported.                                                                                                              |
| Other bias                               | High risk | Power analysis were not calculated. Significant difference existed between groups before treatment.                                                                                                     |

## 11. Sánchez 2012

|                                                             |                                                                                                                                                                                                                                                                                                                                                                                                                                                                                                                                                                                                                                                                                                                                                                                                       |
|-------------------------------------------------------------|-------------------------------------------------------------------------------------------------------------------------------------------------------------------------------------------------------------------------------------------------------------------------------------------------------------------------------------------------------------------------------------------------------------------------------------------------------------------------------------------------------------------------------------------------------------------------------------------------------------------------------------------------------------------------------------------------------------------------------------------------------------------------------------------------------|
| Study type<br>Country<br>Treatment<br>Conflicts of interest | 2-arm RCT<br>Multi-centre, Spain<br>PRP versus Hyaluronic Acid<br>No                                                                                                                                                                                                                                                                                                                                                                                                                                                                                                                                                                                                                                                                                                                                  |
| Participants                                                | <p>Mean age: 59.7y, %Female: 51.7%</p> <p>Mean disease duration: NR</p> <p>Number randomized: 176</p> <p>Follow-up: 1, 2 and 6 months</p> <p><u>Inclusion:</u></p> <p>Age: 40-72y</p> <p>Duration clinical symptoms: NR</p> <p>Symptomatic OA of knee, radiological <b>Ahlbäck</b> grade I-III</p> <p><u>Baseline values:</u></p> <p>BMI: PRP 27.9, HA 28.2</p> <p>Ahlbäck grade n(%)</p> <p>I: PRP 45(51%), HA 42(49%)</p> <p>II: PRP 32(36%), HA 32(38%)</p> <p>III: PRP 12(13%), HA 11(13%)</p> <p>WOMAC score, normalized mean (SD)</p> <p>Pain: PRP 40.4(16), HA 38.4(5.6)</p> <p>Stiffness: PRP 41.8(17.3), HA 38.5(18.3)</p> <p>Physical function: PRP 39.6(16.3), HA 38.8(17.4)</p> <p>Total: PRP 121.8(44.4), HA 115.6(45.1)</p> <p>Lequesne index, mean (SD): PRP 9.5(3.0), HA 9.1(3.2)</p> |

|              |                                                                                                                                                                                                                                                                                                                                                                                                                                                                                                                                                                                                                                                             |
|--------------|-------------------------------------------------------------------------------------------------------------------------------------------------------------------------------------------------------------------------------------------------------------------------------------------------------------------------------------------------------------------------------------------------------------------------------------------------------------------------------------------------------------------------------------------------------------------------------------------------------------------------------------------------------------|
| Intervention | <p>Intervention (n=89):<br/> 3 PRP (type <i>LP-PRP</i>) intra-articular injections<br/> Dose: 8 mL<br/> Interval: weekly<br/> Comparison (n=87)<br/> 3 HA (Euflexxa) intra-articular injections<br/> Dose: NR<br/> Interval: weekly</p>                                                                                                                                                                                                                                                                                                                                                                                                                     |
| Outcomes     | <p><u>Primary outcome:</u><br/> %of patients having a 50% decrease in the summed WOMAC pain subscale score<br/> <u>Secondary outcomes:</u><br/> Normalized WOMAC total score (0-300)<br/> Normalized WOMAC pain score (0-100)<br/> Normalized WOMAC stiffness score (0-100)<br/> Normalized WOMAC physical function score (0-100)<br/> Lequesne index (0-24)<br/> Adverse events</p>                                                                                                                                                                                                                                                                        |
| Results      | <p>50% decrease WOMAC pain score, n (%)<br/> 6 months: PRP 34(38.2%), HA 21(24.1%), P=0.044<br/> Normalized WOMAC total score, mean (SD)<br/> 6 months: PRP 74.0(42.7), HA 78.3(48.1), P=0.561<br/> Normalized WOMAC pain score, mean (SD)<br/> 6 months: PRP 24.1(15.5), HA 26.9(15.8), P=0.265<br/> Normalized WOMAC stiffness score, mean (SD)<br/> 6 months: PRP 25.2(15.4), HA 25.5(17.9), P=0.901<br/> Normalized WOMAC physical function score, mean (SD)<br/> 6 months: PRP 24.8(15.9), HA 25.9(17.2), P=0.682<br/> Lequesne index, mean (SD)<br/> 6 months: PRP 5.2(3.4), HA 5.4(3.3), P=0.714<br/> Adverse events, n: PRP: 26, HA 24, P=0.811</p> |

## Risk of bias

| Bias                                        | Authors' judgement | Support for judgement                                                                                                                                                     |
|---------------------------------------------|--------------------|---------------------------------------------------------------------------------------------------------------------------------------------------------------------------|
| Random sequence generation (selection bias) | Low risk           | Quote: "the treatment assigned by randomization was delivered. A stratified randomization (1 stratum per centre) was carried out"<br>Comment: Probably done               |
| Allocation concealment (selection bias)     | Low risk           | Quote: "... keeping that relation in a sealed envelope"<br>Quote: "This envelope was not opened until the moment before applying the treatment"<br>Comment: Probably done |

|                                                 |           |                                                                                                                                                                                                                                                                                |
|-------------------------------------------------|-----------|--------------------------------------------------------------------------------------------------------------------------------------------------------------------------------------------------------------------------------------------------------------------------------|
| Blinding of participants (performance bias)     | Low risk  | Quote: "To maintain masking, the application area was hidden from view and blood was drawn from all patients ..."<br>Comment: Probably done                                                                                                                                    |
| Blinding of personnel (performance bias)        | High risk | Quote: "Both the evaluators and patients remained blind to the treatments"<br>Reporting "double-blinded" means blinding of the evaluators and patients<br>Comment: Probably not done                                                                                           |
| Blinding of outcome assessment (detection bias) | Low risk  | Quote: "Both the evaluators and patients remained blind to the treatments"<br>Quote: "Response was assessed by researchers not involved in the application of treatment. The data report forms did not make any references to the treatment applied"<br>Comment: Probably done |
| Incomplete outcome data (attrition bias)        | Low risk  | Number of allocated and analysed participants were reported. Reasons for missing data were reported and similar between groups.<br>Analysis: Intention to treat.                                                                                                               |
| Selective reporting (reporting bias)            | Low risk  | All pre-specified outcomes were reported in the pre-specified way.                                                                                                                                                                                                             |
| Other bias                                      | Low risk  | Power analysis were calculated.<br>Comment: unable to find other sources of bias.                                                                                                                                                                                              |

## 12. Smith 2015

|                       |                    |
|-----------------------|--------------------|
| Study type            | 2-arm RCT          |
| Country               | Single centre, USA |
| Treatment             | PRP versus Placebo |
| Conflicts of interest | Yes                |

|              |                                                                                                                                                                                                                                                                                                                                                                                                                                                                                                                                                                                                                                                                                                                                                         |
|--------------|---------------------------------------------------------------------------------------------------------------------------------------------------------------------------------------------------------------------------------------------------------------------------------------------------------------------------------------------------------------------------------------------------------------------------------------------------------------------------------------------------------------------------------------------------------------------------------------------------------------------------------------------------------------------------------------------------------------------------------------------------------|
| Participants | <p>Mean age: 50.06y, %Female: 63.3%</p> <p>Mean disease duration: NR</p> <p>Number randomized: 30</p> <p>Follow-up: 1 and 2 weeks, 2, 3, 6 and 12 months</p> <p><u>Inclusion:</u></p> <p>Age: 30-80y</p> <p>Duration clinical symptoms: &gt;6 weeks</p> <p>Symptomatic OA of knee, radiological <b>Kellgren Lawrence</b> grade II-III</p> <p><u>Baseline values:</u></p> <p>BMI: PRP 29.53, Placebo 27.47</p> <p>Kellgren Lawrence grade, n:</p> <p>II: PRP 8, Placebo 10</p> <p>III: PRP 7, Placebo 5</p> <p>WOMAC score, mean (95%CI)</p> <p>Pain: PRP 10 (9-11), Placebo 11 (10-12)</p> <p>Stiffness: PRP 4 (4-5), Placebo 4 (4-5)</p> <p>Physical function: PRP 32 (27-37), Placebo 31 (26-37)</p> <p>Total: PRP 47 (41-53), Placebo 46 (40-53)</p> |
| Intervention | <p>Intervention (n=15):</p> <p>3 PRP (type <i>LP-PRP</i>) intra-articular injections</p> <p>Dose: 3-8 mL</p> <p>Interval: weekly</p> <p>Comparison (n=15)</p> <p>3 Placebo (saline) intra-articular injections</p> <p>Dose: 3-8 mL</p> <p>Interval: weekly</p>                                                                                                                                                                                                                                                                                                                                                                                                                                                                                          |
| Outcomes     | <p><u>Primary outcomes:</u></p> <p>WOMAC subscales pain (0-20), stiffness (0-8), physical function (0-68) and total score (0-96)</p> <p><u>Secondary outcomes:</u></p> <p>Adverse events</p>                                                                                                                                                                                                                                                                                                                                                                                                                                                                                                                                                            |

|         |                                                                                                                                                                                                                                                                                                                                                                                                                                                                                                                                                                                                                                                                                                                                                                                                                                                                                                                                                                                                                                                                                                                                                                                                                                                                                                                                                                                                                              |
|---------|------------------------------------------------------------------------------------------------------------------------------------------------------------------------------------------------------------------------------------------------------------------------------------------------------------------------------------------------------------------------------------------------------------------------------------------------------------------------------------------------------------------------------------------------------------------------------------------------------------------------------------------------------------------------------------------------------------------------------------------------------------------------------------------------------------------------------------------------------------------------------------------------------------------------------------------------------------------------------------------------------------------------------------------------------------------------------------------------------------------------------------------------------------------------------------------------------------------------------------------------------------------------------------------------------------------------------------------------------------------------------------------------------------------------------|
| Results | <p>WOMAC pain score, mean (95%CI)</p> <p>1 week: PRP 7 (6-8), Placebo 8 (6-10)</p> <p>2 weeks: PRP 4 (2-6), Placebo 8 (6-9)</p> <p>2 months: PRP 3 (1-5), Placebo 7 (5-9)</p> <p>3 months: PRP 2 (1-4), Placebo 8 (6-9)</p> <p>6 months: PRP 3 (1-4), Placebo 9 (7-11)</p> <p>12 months: PRP 2 (1-4), Placebo 9 (6-11)</p> <p>WOMAC stiffness score, mean (95%CI)</p> <p>1 week: PRP 3 (2-4), Placebo 3 (2-4)</p> <p>2 weeks: PRP 2 (1-3), Placebo 3 (2-4)</p> <p>2 months: PRP 1 (1-2), Placebo 3 (2-3)</p> <p>3 months: PRP 1 (0-2), Placebo 3 (2-4)</p> <p>6 months: PRP 1 (0-2), Placebo 4 (3-5)</p> <p>12 months: PRP 1 (0-2), Placebo 4 (3-5)</p> <p>WOMAC physical function score, mean (95%CI)</p> <p>1 week: PRP 24 (21-28), Placebo 27 (21-32)</p> <p>2 weeks: PRP 16 (10-21), Placebo 25 (20-31)</p> <p>2 months: PRP 9 (3-16), Placebo 22 (15-29)</p> <p>3 months: PRP 7 (2-12), Placebo 27 (21-32)</p> <p>6 months: PRP 8 (2-14), Placebo 31 (25-37)</p> <p>12 months: PRP 7 (3-11), Placebo 30 (23-37)</p> <p>WOMAC total score, mean (95%CI)</p> <p>1 week: PRP 35 (29-40), Placebo 38 (30-46)</p> <p>2 weeks: PRP 22 (15-29), Placebo 36 (28-44)</p> <p>2 months: PRP 14 (5-23), Placebo 31 (22-41)</p> <p>3 months: PRP 10 (3-18), Placebo 37 (30-45)</p> <p>6 months: PRP 11 (3-20), Placebo 44 (36-53)</p> <p>12 months: PRP 10 (4-17), Placebo 43 (33-54)</p> <p>Adverse events, n: PRP 0, Placebo 0</p> |
|---------|------------------------------------------------------------------------------------------------------------------------------------------------------------------------------------------------------------------------------------------------------------------------------------------------------------------------------------------------------------------------------------------------------------------------------------------------------------------------------------------------------------------------------------------------------------------------------------------------------------------------------------------------------------------------------------------------------------------------------------------------------------------------------------------------------------------------------------------------------------------------------------------------------------------------------------------------------------------------------------------------------------------------------------------------------------------------------------------------------------------------------------------------------------------------------------------------------------------------------------------------------------------------------------------------------------------------------------------------------------------------------------------------------------------------------|

## Risk of bias

| Bias                                        | Authors' judgement | Support for judgement                                                                                                                                                                                                 |
|---------------------------------------------|--------------------|-----------------------------------------------------------------------------------------------------------------------------------------------------------------------------------------------------------------------|
| Random sequence generation (selection bias) | Low risk           | Quote: "used an automated, internet-based randomization system to ensure concealed randomization from the author and from eligible, consenting subjects"<br>The study was oversight by FDA.<br>Comment: Probably done |
| Allocation concealment (selection bias)     | Low risk           | Quote: "used an automated, internet-based randomization system to ensure concealed randomization from the author and from eligible, consenting subjects"<br>The study was oversight by FDA.<br>Comment: Probably done |

|                                                 |           |                                                                                                                                                                                |
|-------------------------------------------------|-----------|--------------------------------------------------------------------------------------------------------------------------------------------------------------------------------|
| Blinding of participants (performance bias)     | Low risk  | Quote: "This successfully established subject and investigator blinding"<br>This double-blind (patient and investigator) study was oversight by FDA.<br>Comment: Probably done |
| Blinding of personnel (performance bias)        | Low risk  | Quote: "This successfully established subject and investigator blinding"<br>This double-blind (patient and investigator) study was oversight by FDA.<br>Comment: Probably done |
| Blinding of outcome assessment (detection bias) | High risk | Not reported<br>This double-blind (patient and investigator) study was oversight by FDA.<br>Comment: Probably not done                                                         |
| Incomplete outcome data (attrition bias)        | Low risk  | Number of allocated and analysed participants were reported. No patient was excluded for analysis.                                                                             |
| Selective reporting (reporting bias)            | Low risk  | All pre-specified outcomes were reported in the pre-specified way.                                                                                                             |
| Other bias                                      | Low risk  | Despite the small sample size, the study was oversight by FDA and a post hoc power analysis proved adequate sample size, based on outcomes.                                    |

### 13. Spaková 2012

|                       |                            |
|-----------------------|----------------------------|
| Study type            | 2-arm RCT                  |
| Country               | Single centre, Slovakia    |
| Treatment             | PRP versus Hyaluronic Acid |
| Conflicts of interest | No                         |



|              |                                                                                                                                                                                                                                                                                                                                                                                                                                                                                                                                                                                                                                 |
|--------------|---------------------------------------------------------------------------------------------------------------------------------------------------------------------------------------------------------------------------------------------------------------------------------------------------------------------------------------------------------------------------------------------------------------------------------------------------------------------------------------------------------------------------------------------------------------------------------------------------------------------------------|
| Participants | <p>Mean age: 53y, %Female: 47.5%</p> <p>Mean disease duration: NR</p> <p>Number randomized: 120</p> <p>Follow-up: 3 and 6 months</p> <p><u>Inclusion:</u></p> <p>Age: NR</p> <p>Duration clinical symptoms: &gt;6 months</p> <p>Symptomatic OA of knee, radiological <b>Kellgren Lawrence</b> grade I-III</p> <p><u>Baseline values:</u></p> <p>BMI: PRP 27.9, HA 28.3</p> <p>Kellgren Lawrence grade, n:</p> <p>I: PRP 2, HA 2</p> <p>II: PRP 39, HA 37</p> <p>III: PRP 19, HA 21</p> <p>WOMAC total score, mean (SD)</p> <p>Total: PRP 38.76(16.50), HA 43.21(13.70)</p> <p>NRS, mean (SD): PRP 5.27(1.27), HA 6.02(1.77)</p> |
| Intervention | <p>Intervention (n=60):</p> <p>3 PRP (type <i>LR-PRP</i>) intra-articular injections</p> <p>Dose: 3 mL</p> <p>Interval: weekly</p> <p>Comparison (n=60)</p> <p>3 HA (Erectus) intra-articular injections</p> <p>Dose: NR</p> <p>Interval: weekly</p>                                                                                                                                                                                                                                                                                                                                                                            |
| Outcomes     | <p><u>Primary outcomes:</u></p> <p>WOMAC (0-96)</p> <p>NRS (0-11)</p> <p><u>Secondary outcomes:</u></p> <p>Adverse events</p>                                                                                                                                                                                                                                                                                                                                                                                                                                                                                                   |
| Results      | <p>WOMAC total score, mean (SD)</p> <p>3 months: PRP 14.35 (14.18), HA 26.17 (17.47), P&lt;0.01</p> <p>6 months: PRP 18.85 (14.09), HA 30.90 (16.57), P&lt;0.01</p> <p>NRS, mean (SD)</p> <p>3 months: PRP 2.06 (2.02), HA 3.98 (2.27), P&lt;0.01</p> <p>6 months: PRP 2.69 (1.86), HA 4.3 (2.07), P&lt;0.01</p> <p>Adverse events, n: PRP 6, HA 0</p>                                                                                                                                                                                                                                                                          |

## Risk of bias

| Bias | Authors' judgement | Support for judgement |
|------|--------------------|-----------------------|
|------|--------------------|-----------------------|

|                                                 |              |                                                                                                                                                     |
|-------------------------------------------------|--------------|-----------------------------------------------------------------------------------------------------------------------------------------------------|
| Random sequence generation (selection bias)     | Unclear risk | Quote: "Patients were randomly divided into two groups"<br>No further information about randomization methods.<br>Comment: Insufficient information |
| Allocation concealment (selection bias)         | Unclear risk | Not reported.<br>Comment: Insufficient information                                                                                                  |
| Blinding of participants (performance bias)     | Unclear risk | Not reported.<br>Comment: Insufficient information                                                                                                  |
| Blinding of personnel (performance bias)        | Unclear risk | Not reported.<br>Comment: Insufficient information                                                                                                  |
| Blinding of outcome assessment (detection bias) | Unclear risk | Not reported.<br>Comment: Insufficient information                                                                                                  |
| Incomplete outcome data (attrition bias)        | Unclear risk | Not reported.<br>Comment: Insufficient information                                                                                                  |
| Selective reporting (reporting bias)            | Low risk     | All pre-specified outcomes were reported.                                                                                                           |
| Other bias                                      | Unclear risk | Power analysis calculation was not reported.<br>Comment: Insufficient information                                                                   |

#### 14. Vaquerizo 2013

|                       |                            |
|-----------------------|----------------------------|
| Study type            | 2-arm RCT                  |
| Country               | Multi-centre, Spain        |
| Treatment             | PRP versus Hyaluronic Acid |
| Conflicts of interest | Yes                        |

|              |                                                                                                                                                                                                                                                                                                                                                                                                                                                                                                                                                                                                                                                                                                                                                                  |
|--------------|------------------------------------------------------------------------------------------------------------------------------------------------------------------------------------------------------------------------------------------------------------------------------------------------------------------------------------------------------------------------------------------------------------------------------------------------------------------------------------------------------------------------------------------------------------------------------------------------------------------------------------------------------------------------------------------------------------------------------------------------------------------|
| Participants | <p>Mean age: 63.6y, %Female: 60.4%<br/> Mean disease duration: NR<br/> Number randomized: 96<br/> Follow-up: 24 and 48 weeks<br/> <u>Inclusion:</u><br/> Age: &gt;50y<br/> Duration clinical symptoms: &gt;6 months<br/> Symptomatic OA of knee, radiological<br/> <b>Kellgren Lawrence</b> grade II-IV<br/> <u>Baseline values:</u><br/> Kellgren Lawrence grade n(%):<br/> II: PRP 14(29.2%), HA 18(37.5%)<br/> III: PRP 26(54.2%), HA 21(43.8%)<br/> IV: PRP 8(16.7%), HA 9(18.8%)<br/> WOMAC score, mean (SD)<br/> Pain: PRP 9.6(2.5), HA 10.2(3.5)<br/> Stiffness: PRP 3.7(1.7), HA 4.0(2.0)<br/> Physical function: PRP 32.6(9.9), HA 36.7(13.7)<br/> Total: PRP 45.9(12.7), HA 50.8(18.4)<br/> Lequesne index, mean (SD): PRP 12.8(3.8), HA 13.1(3.8)</p> |
| Intervention | <p>Intervention (n=48):<br/> 3 PRP (type <i>LP-PRP</i>) intra-articular injections<br/> Dose: 8 mL<br/> Interval: biweekly<br/> Comparison (n=48)<br/> 1 HA (Durolane) intra-articular injections<br/> Dose: 60mg/3mL<br/> Interval: Not applicable</p>                                                                                                                                                                                                                                                                                                                                                                                                                                                                                                          |
| Outcomes     | <p><u>Primary outcomes:</u><br/> % of patients having a 30% decrease and 50% decrease in the summed WOMAC subscale scores—pain, stiffness and physical function and Lequesne index<br/> <u>Secondary outcomes:</u><br/> WOMAC subscales pain (0-20), stiffness (0-8), physical function (0-68) and total score (0-96)<br/> Lequesne scale (0-24)<br/> Adverse events</p>                                                                                                                                                                                                                                                                                                                                                                                         |

|         |                                                                                                                                                                                                                                                                                                                                                                                                                                                                                                                                                                                                                                                                                                                                                                                                                                                                                                                                                                                                                                                                                                                                                                                                                                                                                                                                                                                                                                                                                                                                                                                                                                                                                                                                                                                                                                                                                                                                                                                                                                        |
|---------|----------------------------------------------------------------------------------------------------------------------------------------------------------------------------------------------------------------------------------------------------------------------------------------------------------------------------------------------------------------------------------------------------------------------------------------------------------------------------------------------------------------------------------------------------------------------------------------------------------------------------------------------------------------------------------------------------------------------------------------------------------------------------------------------------------------------------------------------------------------------------------------------------------------------------------------------------------------------------------------------------------------------------------------------------------------------------------------------------------------------------------------------------------------------------------------------------------------------------------------------------------------------------------------------------------------------------------------------------------------------------------------------------------------------------------------------------------------------------------------------------------------------------------------------------------------------------------------------------------------------------------------------------------------------------------------------------------------------------------------------------------------------------------------------------------------------------------------------------------------------------------------------------------------------------------------------------------------------------------------------------------------------------------------|
| Results | <p>30% decrease WOMAC pain score, n(%)<br/> 24 weeks: PRP 40(83%), HA 7 (17%), P&lt;0.001<br/> 48 weeks: PRP 28(58.3%), HA 5(11.9%), P&lt;0.001</p> <p>30% decrease WOMAC stiffness score, n(%)<br/> 24 weeks: PRP 24(52%), HA 11 (27%), P&lt;0.02<br/> 48 weeks: PRP 24(52.2%), HA 5(12.2%), P&lt;0.001</p> <p>30% decrease WOMAC physical function score, n(%)<br/> 24 weeks: PRP 29(60%), HA 5 (11%), P&lt;0.001<br/> 48 weeks: PRP 26(54.2%), HA 7(16.7%), P&lt;0.001</p> <p>50% decrease WOMAC pain score, n(%)<br/> 24 weeks: PRP 26(54%), HA 5 (11%), P&lt;0.001<br/> 48 weeks: PRP 15(31%), HA 1(2%), P&lt;0.001</p> <p>50% decrease WOMAC stiffness score, n(%)<br/> 24 weeks: PRP 16(35%), HA 7 (16%), P=0.035<br/> 48 weeks: PRP 16(33%), HA 2(5%), P=0.001</p> <p>50% decrease WOMAC physical function score, n(%)<br/> 24 weeks: PRP 19(40%), HA 5 (11%), P=0.001<br/> 48 weeks: PRP 15(31%), HA 0 (0), P=0.001</p> <p>30% decrease Lequesne index, n(%)<br/> 24 weeks: PRP 35(73%), HA 7 (17%), P&lt;0.001<br/> 48 weeks: PRP 23(47.9%), HA 1(2.4%), P&lt;0.001</p> <p>50% decrease Lequesne index, n(%)<br/> 24 weeks: PRP 14(29%), HA 9 (19%), P=0.002<br/> 48 weeks: PRP 2(4%), HA 1(2%), P=0.017</p> <p>WOMAC pain score, mean (SD)<br/> 24 weeks: PRP 5.0 (3.1), HA 10.3 (4.8), P&lt;0.001<br/> 48 weeks: PRP 6.3 (3.3), HA 10.7 (3.7), P&lt;0.001</p> <p>WOMAC stiffness score, mean (SD)<br/> 24 weeks: PRP 2.5 (1.7), HA 4.0 (2.3), P&lt;0.001<br/> 48 weeks: PRP 2.6 (1.4), HA 4.7 (2.0), P&lt;0.001</p> <p>WOMAC physical function score, mean (SD)<br/> 24 weeks: PRP 19.7 (11.1), HA 36.2 (16.8), P&lt;0.001<br/> 48 weeks: PRP 21.9 (11.3), HA 38.9 (14.2), P&lt;0.001</p> <p>WOMAC total score, mean (SD)<br/> 24 weeks: PRP 27.2 (15.1), HA 50.4 (23.2), P&lt;0.001<br/> 48 weeks: PRP 30.8 (15.5), HA 54.2 (19.2), P&lt;0.001</p> <p>Lequesne index, mean (SD)<br/> 24 weeks: PRP 5.2 (3.4), HA 5.4 (3.3),<br/> 48 weeks: PRP 8.9 (3.7), HA 14.4 (3.8),<br/> Adverse events, n: PRP 7, HA 9, P=0.610</p> |
|---------|----------------------------------------------------------------------------------------------------------------------------------------------------------------------------------------------------------------------------------------------------------------------------------------------------------------------------------------------------------------------------------------------------------------------------------------------------------------------------------------------------------------------------------------------------------------------------------------------------------------------------------------------------------------------------------------------------------------------------------------------------------------------------------------------------------------------------------------------------------------------------------------------------------------------------------------------------------------------------------------------------------------------------------------------------------------------------------------------------------------------------------------------------------------------------------------------------------------------------------------------------------------------------------------------------------------------------------------------------------------------------------------------------------------------------------------------------------------------------------------------------------------------------------------------------------------------------------------------------------------------------------------------------------------------------------------------------------------------------------------------------------------------------------------------------------------------------------------------------------------------------------------------------------------------------------------------------------------------------------------------------------------------------------------|

### Risk of bias

| Bias | Authors' judgement | Support for judgement |
|------|--------------------|-----------------------|
|------|--------------------|-----------------------|

|                                                 |              |                                                                                                                                                                                                                                                |
|-------------------------------------------------|--------------|------------------------------------------------------------------------------------------------------------------------------------------------------------------------------------------------------------------------------------------------|
| Random sequence generation (selection bias)     | Low risk     | Quote: "The correspondence between the number of patients and their treatment was performed by use of specific software for randomization"<br>Comment: Probably done                                                                           |
| Allocation concealment (selection bias)         | Low risk     | Quote: "... keeping that relation in a sealed envelope"<br>Quote: "This envelope was not opened until the moment before applying the treatment"<br>Comment: Probably done                                                                      |
| Blinding of participants (performance bias)     | Unclear risk | Quote: "To maintain masking, the application area was hidden from view and blood was drawn from all patients ..."<br>However, the difference in injection times between groups make the blinding difficult.<br>Comment: inadequate information |
| Blinding of personnel (performance bias)        | High risk    | Quote: "Both the evaluators and patients remained blind to the assignment of treatments"<br>Reporting "double-blinded" means blinding of the evaluators and patients<br>Comment: Probably not done                                             |
| Blinding of outcome assessment (detection bias) | Low risk     | Quote: "Both the evaluators and patients remained blind to the assignment of treatments"<br>Quote: "response was assessed by researchers not involved in the application of treatment (blinded)"<br>Comment: Probably done                     |
| Incomplete outcome data (attrition bias)        | High risk    | Number of allocated and analysed participants were reported. Reasons for missing data were reported and similar between groups. But 6 patients were excluded for analysis in the HA group at 48 weeks.                                         |
| Selective reporting (reporting bias)            | Low risk     | All pre-specified outcomes were reported in the pre-specified way.                                                                                                                                                                             |
| Other bias                                      | Low risk     | Power analysis were calculated.<br>Comment: unable to find other sources of bias.                                                                                                                                                              |

## Characteristics of excluded studies

| Study               | Reasons for exclusion                                            |
|---------------------|------------------------------------------------------------------|
| Acosta-Olivo 2014   | Control group: oral paracetamol                                  |
| Angoorani 2015      | Control group: Transcutaneous Electrical Nerve Stimulation       |
| Filardo 2012 in BMC | A preliminary report of "Filardo 2015" study                     |
| Filardo 2012        | Control group: another PRP preparation                           |
| Mariani 2016        | Subjects from a published trial by "Filardo 2015"                |
| Gobbi 2015          | Control group: PRP only (with different frequency of injections) |
| Kavadar 2015        | Control group: PRP only (with different frequency of injections) |
| Rayegani 2014       | Control group: Therapeutic exercise                              |

NR, not reported; ACP, autologous conditioned plasma; LP-PRP, leukocyte-poor PRP; BMI, body mass index; LR-PRP, leukocyte-rich PRP; NRS, numeric rating scale.

\* Details concerning the study design were obtained from the authors.

# Data were obtained from the authors by email.
