# Supplementary material for: The temporal effect of platelet-rich plasma on pain and physical function in the treatment of knee osteoarthritis: systematic review and meta-analysis of randomized controlled trials
Source: J Orthop Surg Res. 2017 Jan 23;12:16. doi: 10.1186/s13018-017-0521-3 (PMC5260061; doi:10.1186/s13018-017-0521-3)
Supplement: Additional file 1: — Intervention protocol. (PDF 119 kb) [file 13018_2017_521_MOESM1_ESM.pdf]

## PROSPERO International prospective register of systematic reviews

### Platelet-rich plasma versus other intra-articular injections for treatment of knee osteoarthritis: a systemic review of randomized controlled trials

*Xuetao Xie, Longxiang Shen, Ting Yuan, Shengbao Chen*

#### Citation

Xuetao Xie, Longxiang Shen, Ting Yuan, Shengbao Chen. Platelet-rich plasma versus other intra-articular injections for treatment of knee osteoarthritis: a systemic review of randomized controlled trials. PROSPERO 2016:CRD42016045410 Available from [http://www.crd.york.ac.uk/PROSPERO\\_REBRANDING/display\\_record.asp?ID=CRD42016045410](http://www.crd.york.ac.uk/PROSPERO_REBRANDING/display_record.asp?ID=CRD42016045410)

#### Review question(s)

To assess the efficacy and safety of platelet-rich plasma versus other intra-articular injections for treatment of knee osteoarthritis

#### Searches

Database: PubMed, EMBASE, Cochrane Library and Scopus

potential search strategy: (platelet[text word] OR plasma[text word]) AND (knee[text word] OR tibiofemoral[text word] OR patellofemoral[text word]) AND (\*arthritis[text word] OR \*arthritic[text word] OR cartilage[text word] OR \*arthrosis[text word] OR gonarthrosis[text word]) AND random\*[text word]

Restrictions: limit to human; no language restrictions

#### Types of study to be included

Inclusions: randomized controlled studies

Exclusions: ongoing randomized controlled studies or those without complete data for analysis

#### Condition or domain being studied

knee osteoarthritis

#### Participants/ population

Inclusion criteria: patients aged 18 and over; with symptomatic knee degeneration

Exclusion criteria: history of surgical treatment of knee degeneration

#### Intervention(s), exposure(s)

Inclusion criteria: autologous platelet-rich plasma was injected into the osteoarthritic knee joints

Exclusion criteria: platelet-rich plasma was used in combination with surgery or other treatments considered as effective to relieve the symptoms of knee osteoarthritis

#### Comparator(s)/ control

Inclusion criteria: other intra-articular injections, such as placebo, hyaluronic acids, ozone, corticosteroids and so on.

Exclusion criteria: intra-articular injections in combination with other treatments considered as effective to relieve the symptoms of knee osteoarthritis

#### Outcome(s)

Primary outcomes

The knee scores at the last follow-up, measured by the Western Ontario and McMaster Universities Arthritis Index

### Secondary outcomes

Adverse events;

Patient satisfaction

### Risk of bias (quality) assessment

As suggested by the Cochrane Handbook for systemic reviews of interventions, two review authors will independently assess the risk of bias in included studies by considering the following characteristics:

random sequence generation (selection bias), allocation concealment (selection bias), blinding of participants (performance bias), blinding of personnel (performance bias), blinding of outcome assessment (detection bias), incomplete outcome data (attrition bias), selective reporting (reporting bias), and other bias.

Disagreements between the review authors over the risk of bias in particular studies will be resolved by discussion, with involvement of a third review author where necessary.

### Strategy for data synthesis

We will present tables to provide a narrative synthesis of the findings from the included studies, structured around the type of intervention, target population characteristics, type of outcome and intervention content.

We anticipate that there will be limited scope for meta-analysis because of the range of different outcomes measured across the small number of existing trials. However, where studies have used the same type of intervention and comparator, with the same outcome measure, we will pool the results using a random-effects meta-analysis, with standardised mean differences for continuous outcomes and risk ratios for binary outcomes, and calculate 95% confidence intervals and two sided P values for each outcome. Heterogeneity between the studies in effect measures will be assessed using the I-squared statistic. We will consider an I-squared value greater than 50% indicative of substantial heterogeneity. We will conduct sensitivity analyses based on study quality. We will use stratified meta-analyses to explore heterogeneity in effect estimates according to: study quality; study populations; the logistics of intervention provision; and intervention content. We will also assess evidence of publication bias.

### Analysis of subgroups or subsets

If the necessary data are available, subgroup analyses will be done for participants treated by different preparations of platelet-rich plasma, at different follow-ups, and with different controls. This is a systemic review including qualitative and quantitative synthesis and while subgroup analyses may be undertaken it is not possible to specify the groups in advance.

### Contact details for further information

Dr Xie

600 Yishan Road, Shanghai, 200233 China

xuetaoxie@163.com

### Organisational affiliation of the review

Shanghai Sixth People's Hospital

<http://www.6thhosp.com/index.html>

### Review team

Dr Xuetao Xie, Shanghai Sixth People's Hospital

Dr Longxiang Shen, Shanghai Sixth People's Hospital

Dr Ting Yuan, Shanghai Sixth People's Hospital

Dr Shengbao Chen, Shanghai Jiaotong University

**Anticipated or actual start date**

01 July 2016

**Anticipated completion date**

15 September 2016

**Funding sources/sponsors**

National Natural Science Foundation of China (Grant No. 81401799); Shanghai Youth Science and Technology Start-up Grants (14YF1412100)

**Conflicts of interest**

None known

**Language**

English

**Country**

China

**Subject index terms status**

Subject indexing assigned by CRD

**Subject index terms**

Cartilage, Articular; Humans; Injections, Intra-Articular; Osteoarthritis, Knee; Platelet-Rich Plasma; Randomized Controlled Trials as Topic

**Reference and/or URL for protocol**

[http://www.crd.york.ac.uk/PROSPEROFILES/45410\\_PROTOCOL\\_20160714.pdf](http://www.crd.york.ac.uk/PROSPEROFILES/45410_PROTOCOL_20160714.pdf)

**Stage of review**

Completed but not published

**Date of registration in PROSPERO**

08 August 2016

**Date of publication of this revision**

15 August 2016

**Stage of review at time of this submission**

|                                                                 | <b>Started</b> | <b>Completed</b> |
|-----------------------------------------------------------------|----------------|------------------|
| Preliminary searches                                            | Yes            | Yes              |
| Piloting of the study selection process                         | Yes            | Yes              |
| Formal screening of search results against eligibility criteria | Yes            | Yes              |
| Data extraction                                                 | Yes            | Yes              |
| Risk of bias (quality) assessment                               | Yes            | Yes              |
| Data analysis                                                   | Yes            | Yes              |

---

**PROSPERO**

**International prospective register of systematic reviews**

The information in this record has been provided by the named contact for this review. CRD has accepted this information in good faith and registered the review in PROSPERO. CRD bears no responsibility or liability for the content of this registration record, any associated files or external websites.

---
