# Supplementary material for: The temporal effect of platelet-rich plasma on pain and physical function in the treatment of knee osteoarthritis: systematic review and meta-analysis of randomized controlled trials
Source: Springer Nature journal article supplement (doi:10.1186/s13018-017-0521-3), 2017-01-23
Supplement: MOESM3 [file 12014302]

### **Additional file 3** Search Strategy and Study Selection

**Search Date:** Nov. 15, 2016

#### **Pubmed**

Search term: (platelet[text word] OR plasma[text word]) AND (Knee[text word] OR tibiofemoral[text word] OR patellofemoral[text word]) AND (\*arthritis[text word] OR \*arthritic[text word] OR cartilage[text word] OR \*arthrosis[text word] OR gonarthrosis[text word]) AND random\*[text word]

Limits to human

Search results: 40

#### **Scopus**

1960 to 2016

Search Term: (platelet[TITLE-ABS-KEY] OR plasma[TITLE-ABS-KEY]) AND (Knee[TITLE-ABS-KEY] OR tibiofemoral[TITLE-ABS-KEY] OR patellofemoral[TITLE-ABS-KEY]) AND (\*arthritis[TITLE-ABS-KEY] OR \*arthritic[TITLE-ABS-KEY] OR cartilage[TITLE-ABS-KEY] OR \*arthrosis[TITLE-ABS-KEY]) AND random\*[TITLE-ABS-KEY]

Search results: 224

#### **Embase**

1945 to 2016

Search term: (platelet[text word] OR plasma[text word]) AND (Knee[text word] OR tibiofemoral[text word] OR patellofemoral[text word]) AND (arthritis[text word] OR arthritic[text word] OR cartilage[text word] OR arthrosis[text word] OR osteoarthritis[text word] OR osteoarthritic[text word] OR gonarthrosis[text word]) AND random\*[text word]

Without limits: 245

limits to human: 213

Search results: 213

### **Cochrane**

Search term: (platelet[text word] OR plasma[text word]) AND (Knee[text word] OR tibiofemoral[text word] OR patellofemoral[text word]) AND (\*arthritis[text word] OR \*arthritic[text word] OR cartilage[text word] OR \*arthrosis[text word] OR gonarthrosis[text word]) AND random\*[text word]

Without limits: 191

limits to reviews: 69

Search results: 69

**Total 40 + 224 + 213 + 69 = 546**

### **Other sources: from reviews' references**

2 ( TITLE: Platelet-rich plasma intra-articular injections for cartilage degeneration and osteoarthritis: single- versus double-spinning approach. ) (TITLE: Effect of single injection of platelet-rich plasma in comparison with corticosteroid on knee osteoarthritis: a double-blind randomized clinical trial)

### **Study Selection**

**Step 1:** Remove Duplicates in EndNote X7: 202

After removal of duplicates  $546 + 2 - 202 = 346$

**Step 2:** Read titles and abstracts, remove

due to Not PRP in OA 258

Not knee 3

Not human 4

Not article 41

After removal  $346-258-3-4-41=40$

**Step 3:** Read full-texts, remove

Not RCTs 6

with arthroplasty: 5

with arthroscopy 3

with osteotomy 2

Control group: oral treatment 2

physical therapy 2

PRP 4

Preliminary results 1

From another trial 1 (TITLE: Leukocyte-Rich Platelet-Rich Plasma Injections Do Not Up-Modulate Intra-Articular Pro-Inflammatory Cytokines in the Osteoarthritic Knee)

After removal  $40-6-5-3-2-2-2-4-1-1=14$

**Final Analysis:** 14 studies
